# Supplementary material
Source: PubMed Central journal article supplement (PMC2656592)
Supplement: NIHMS76344-supplement-SuppFigure1.pdf [file NIHMS76344-supplement-SuppFigure1.pdf]

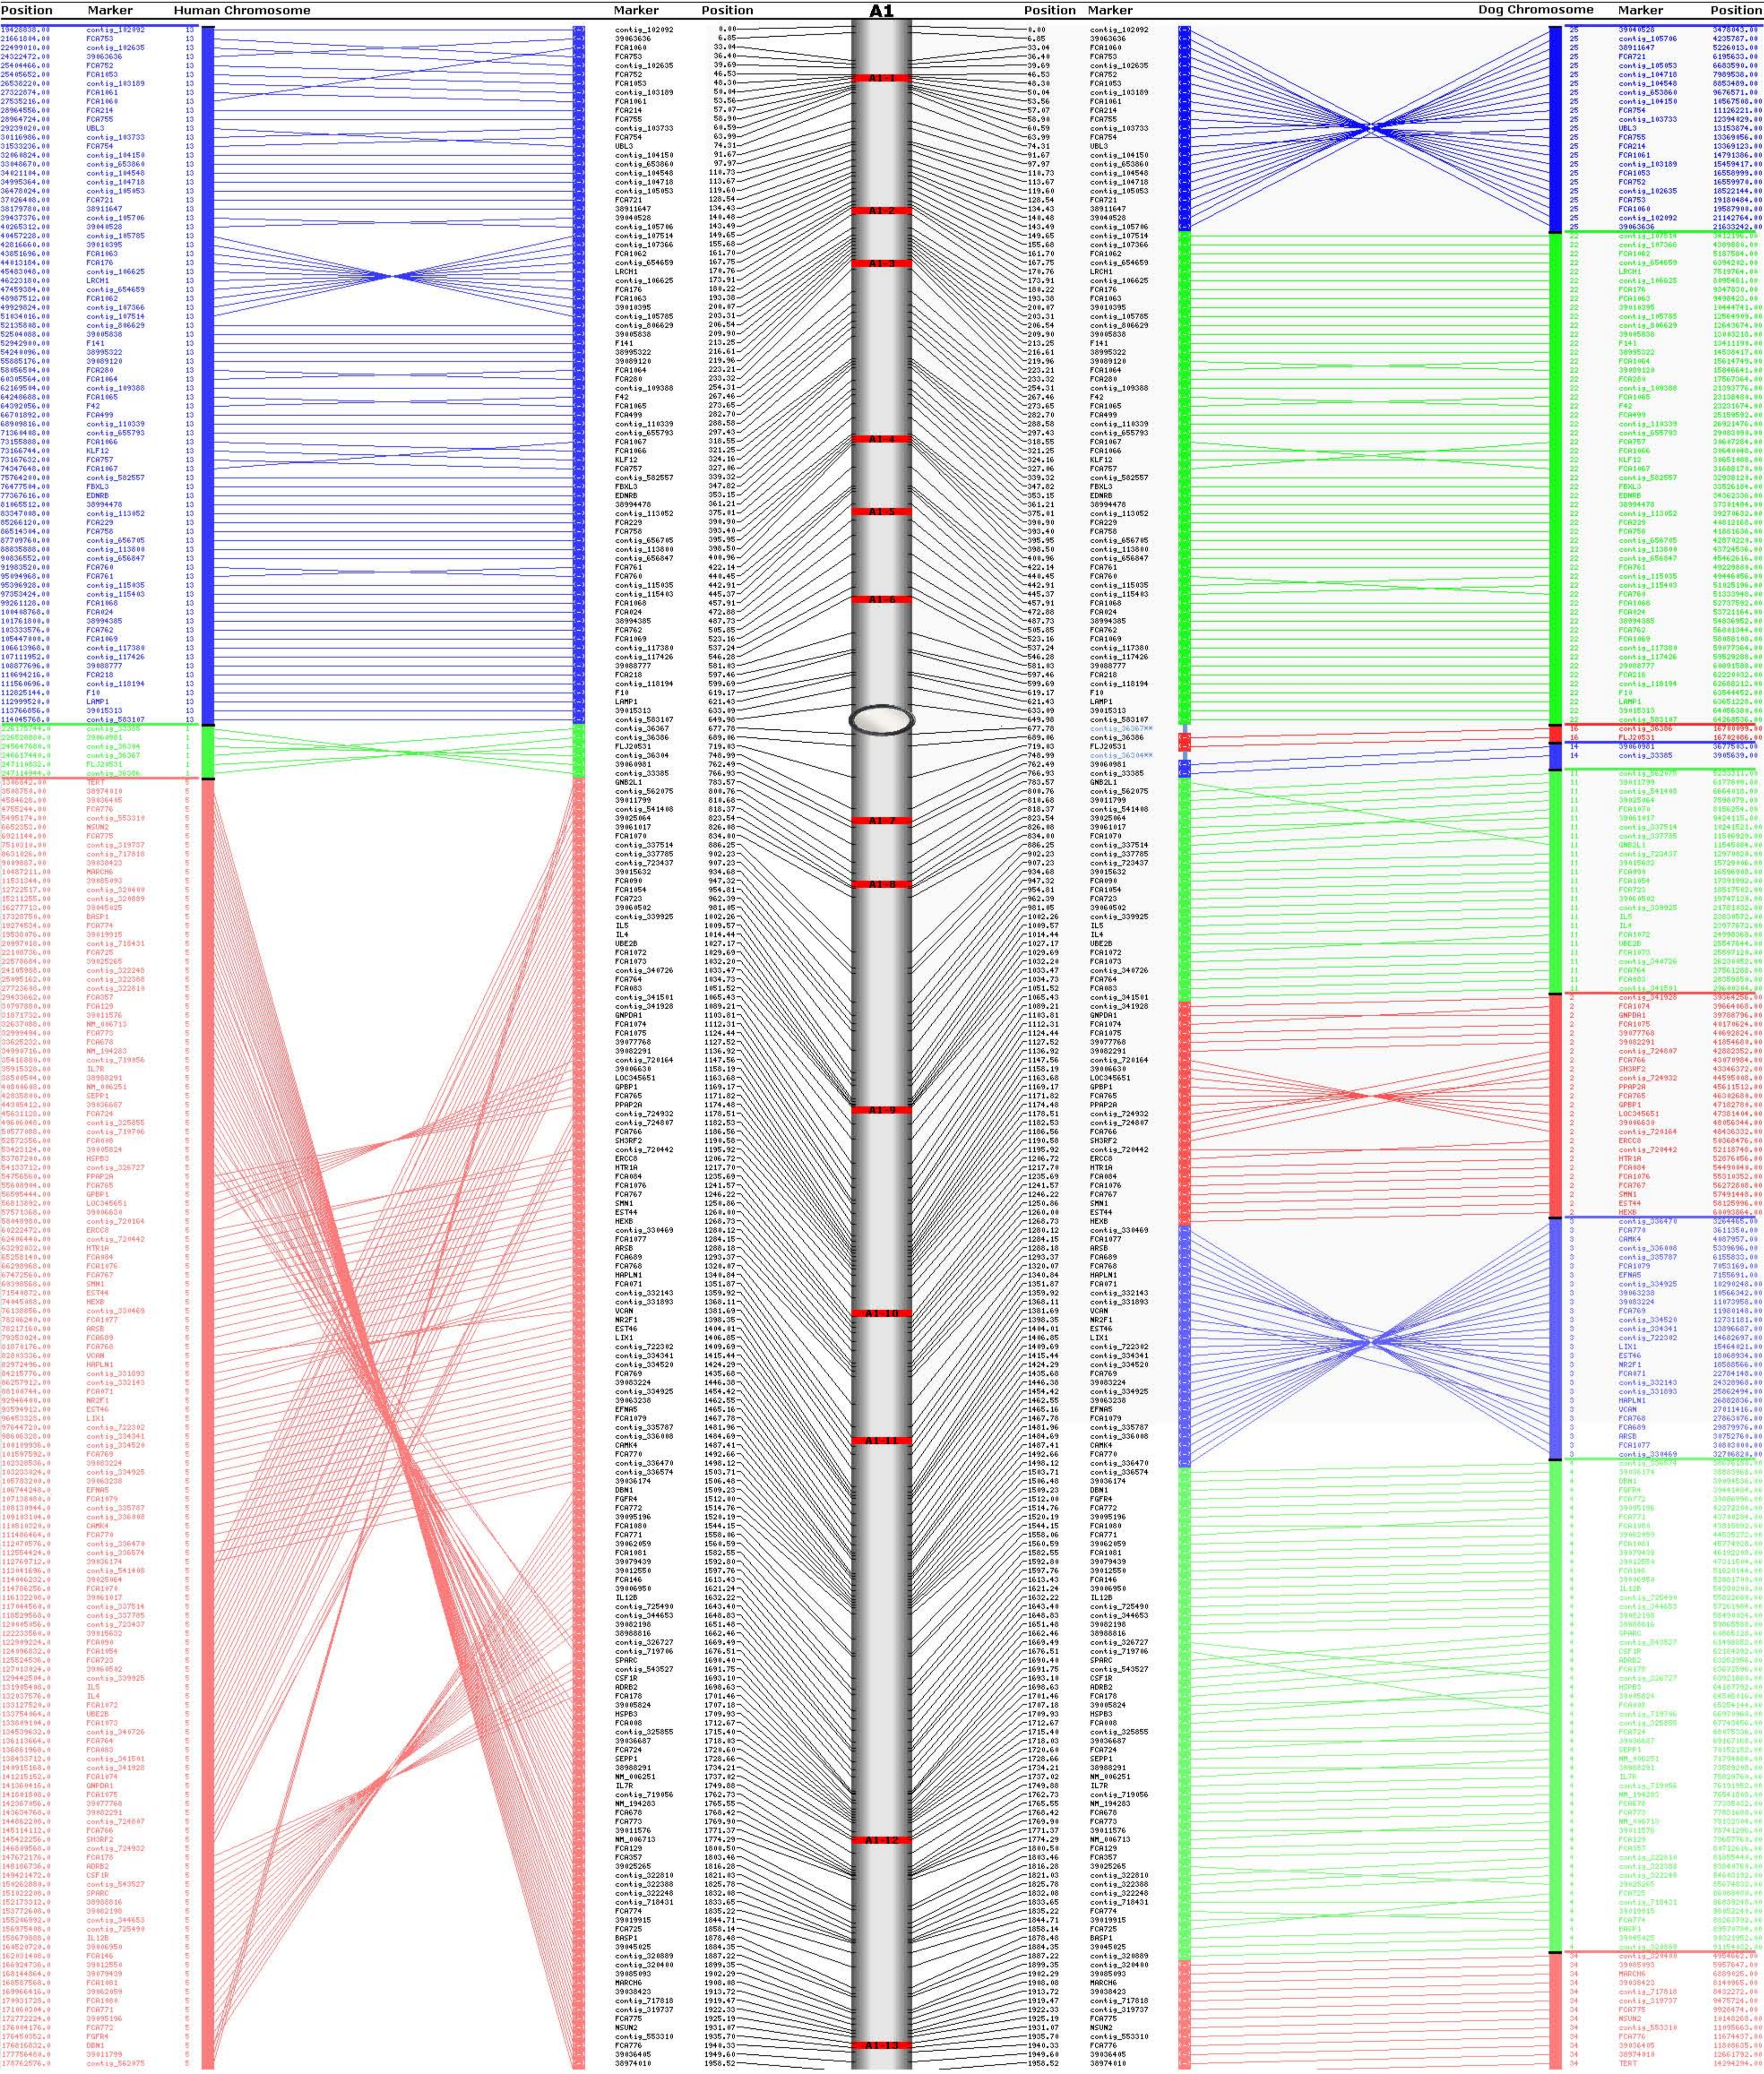

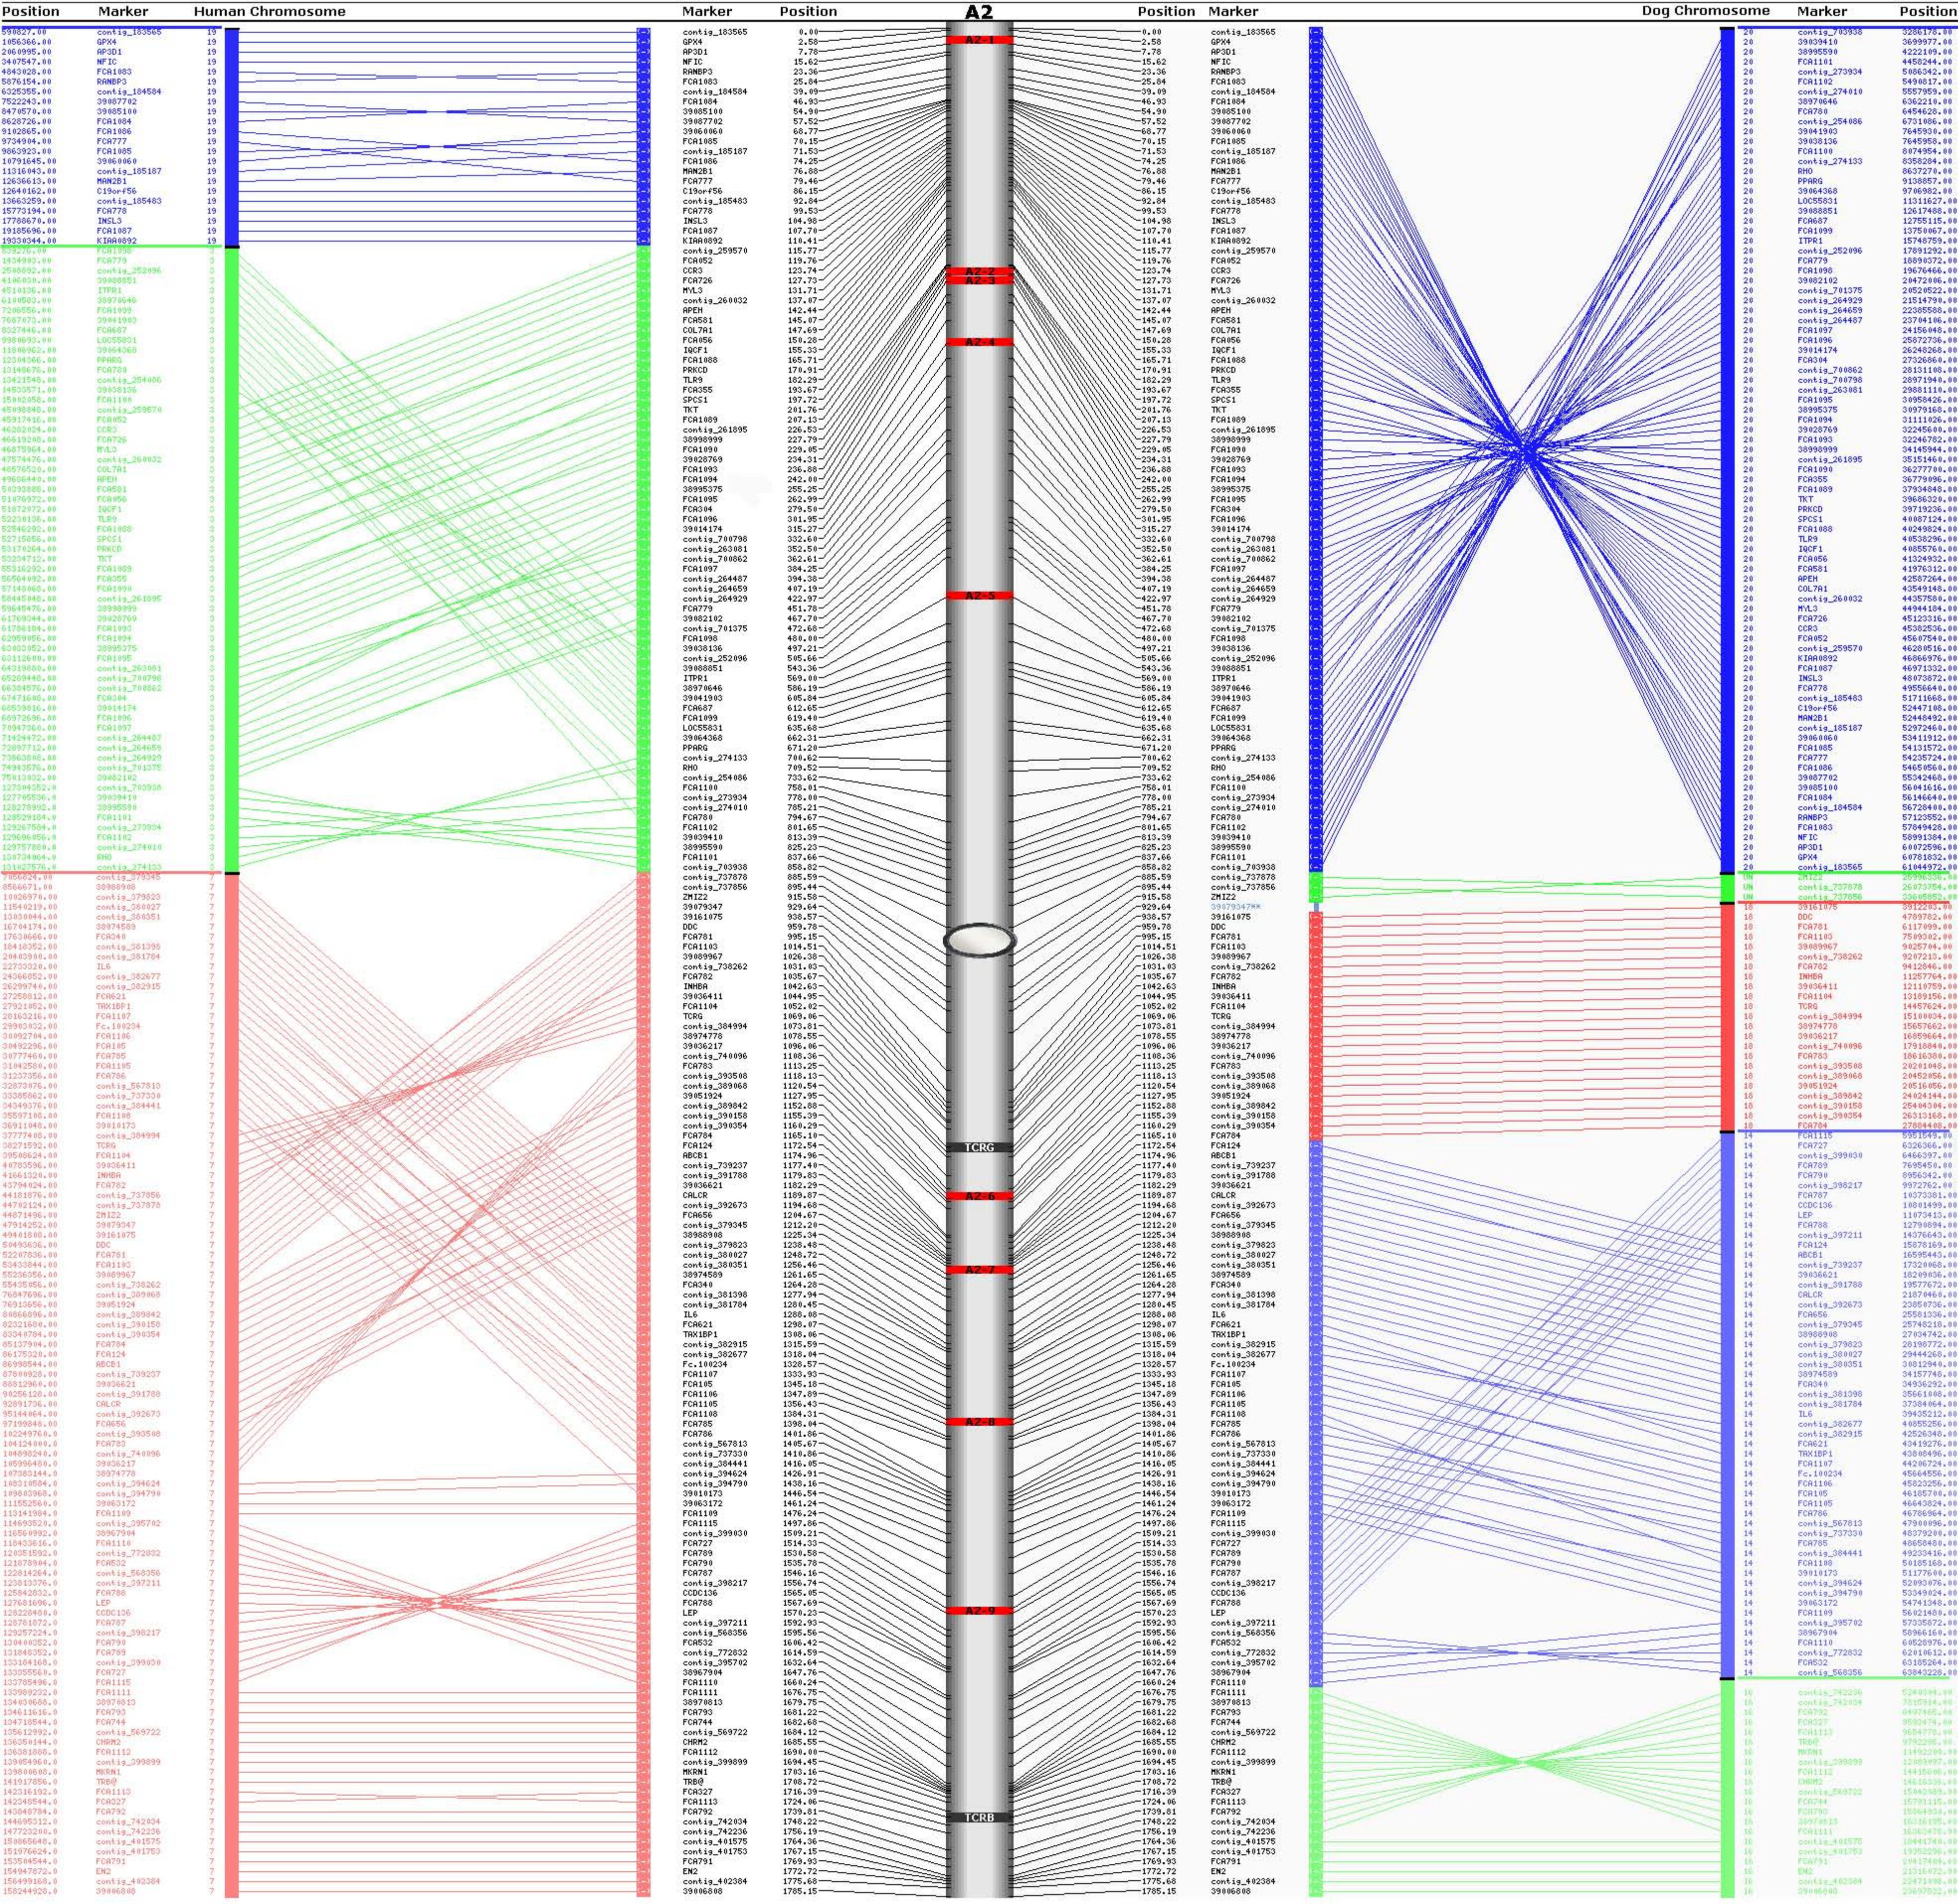

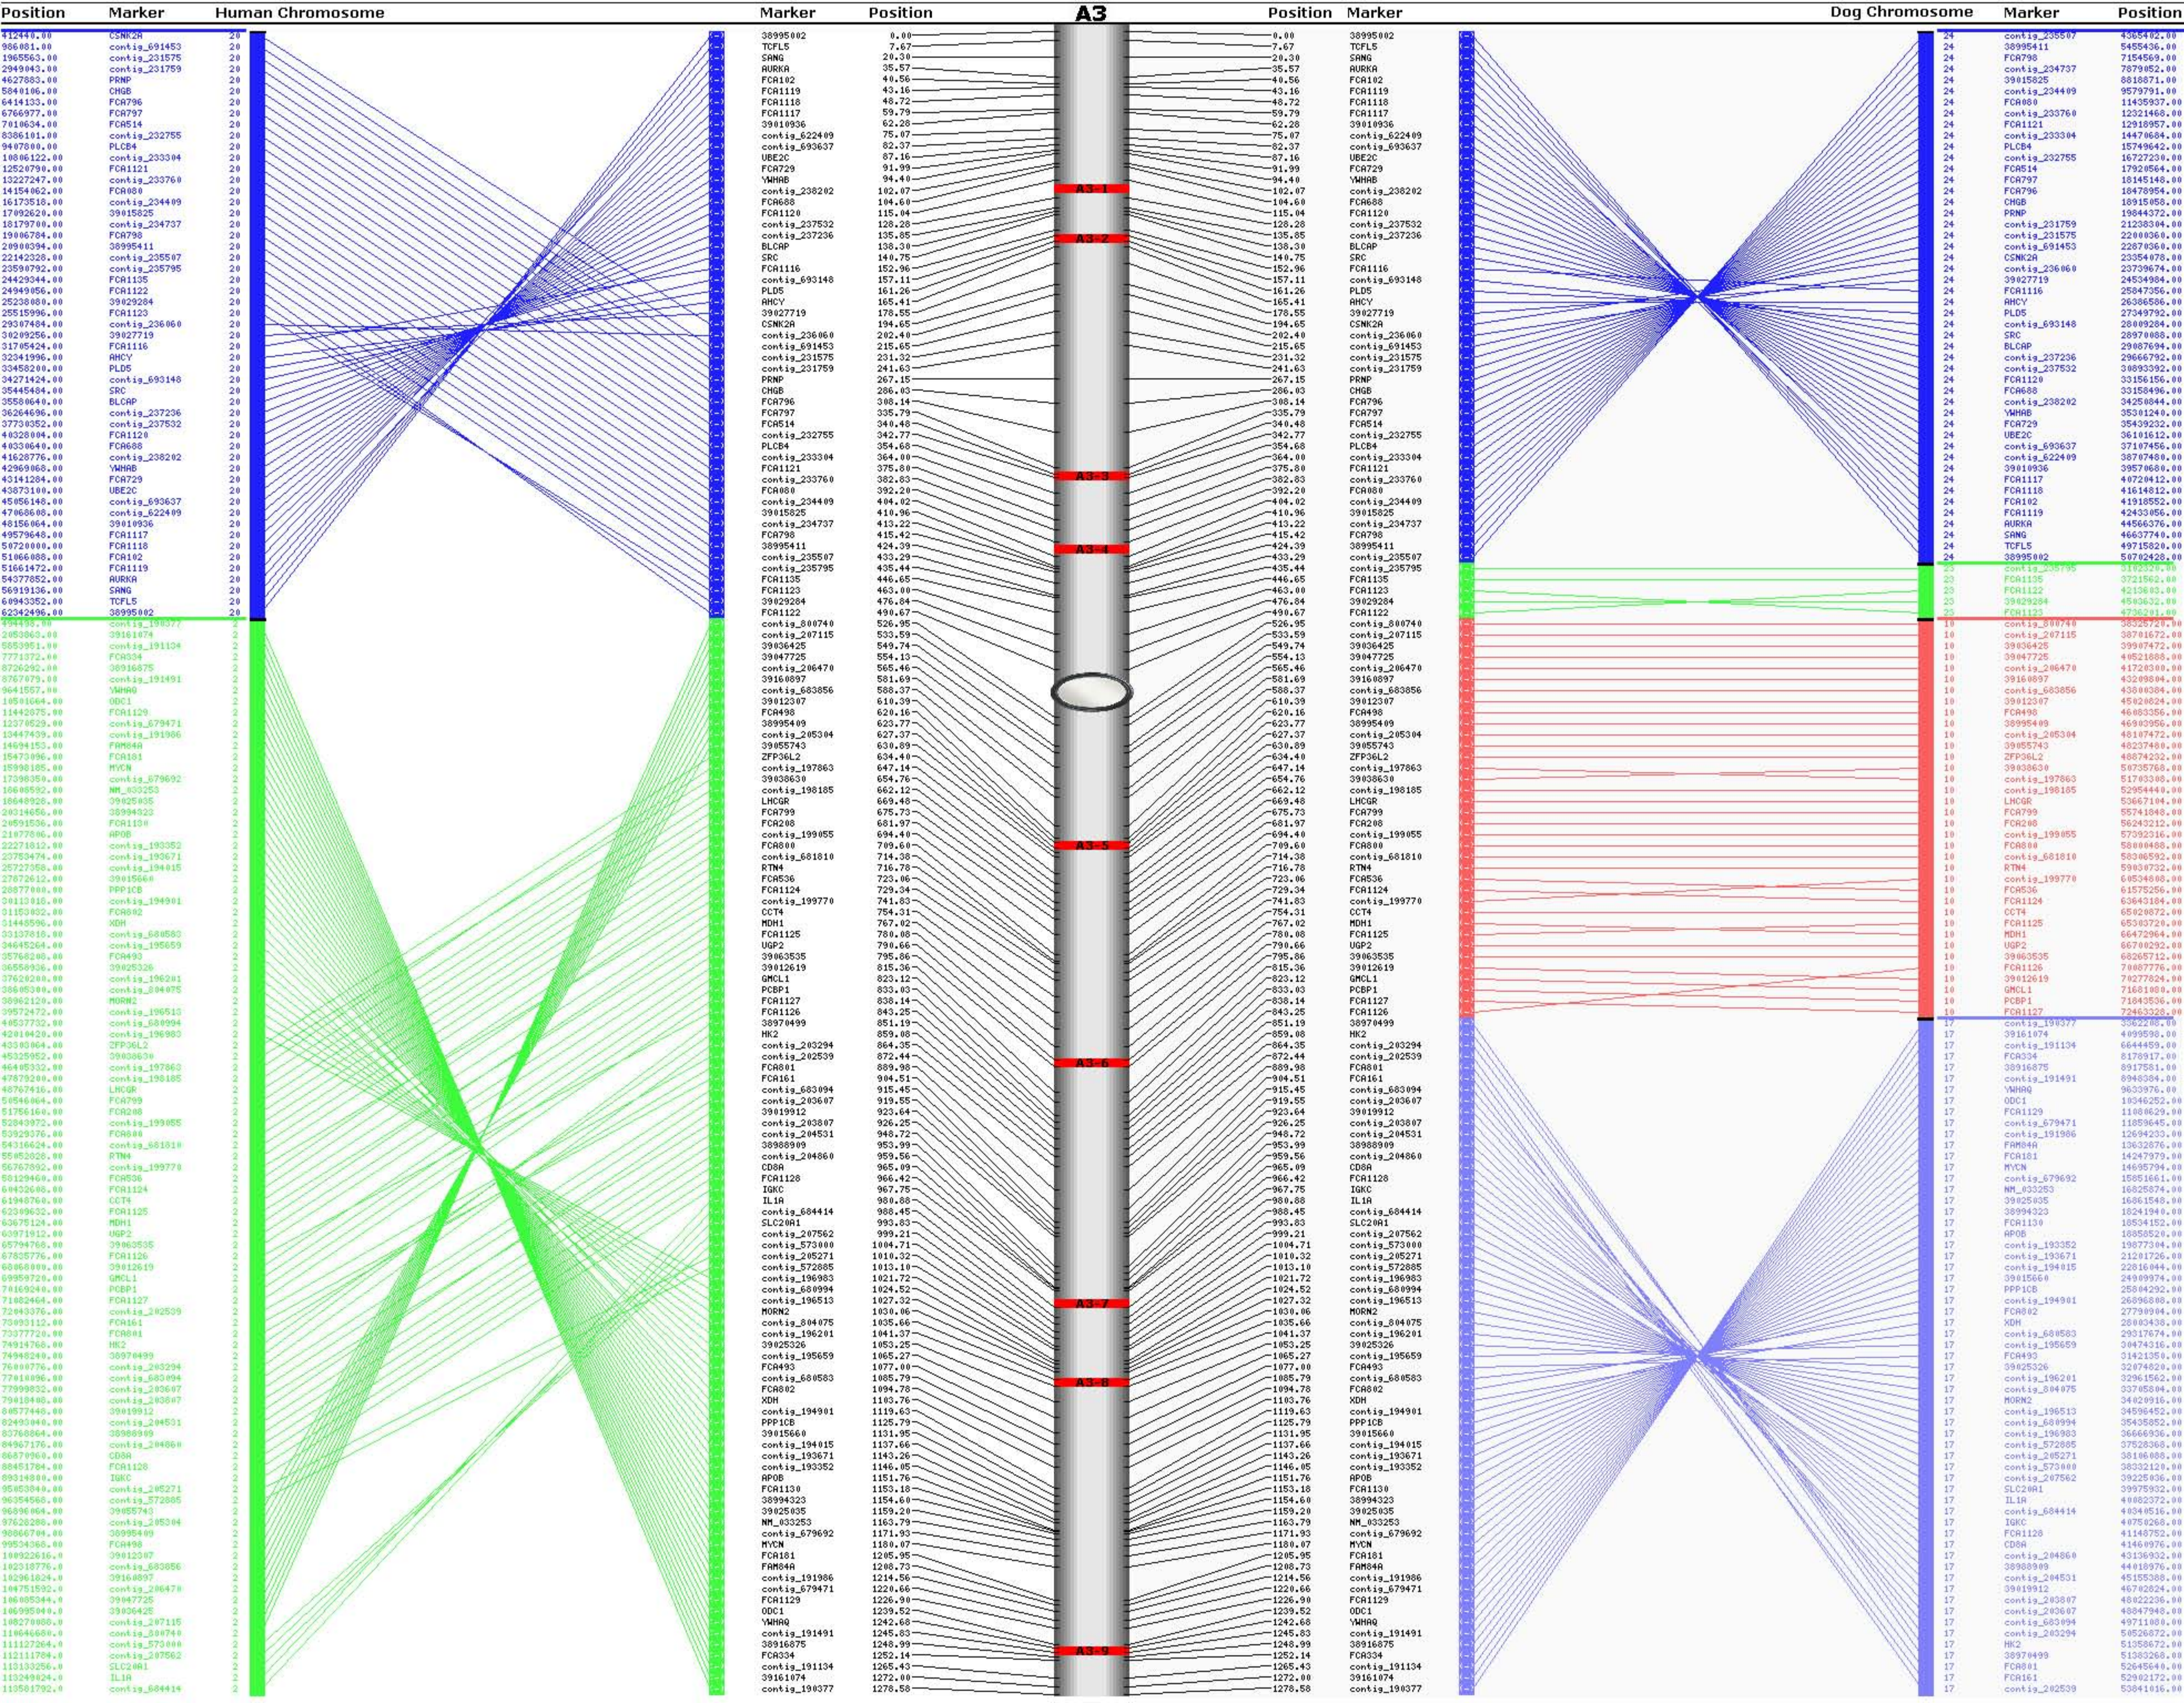

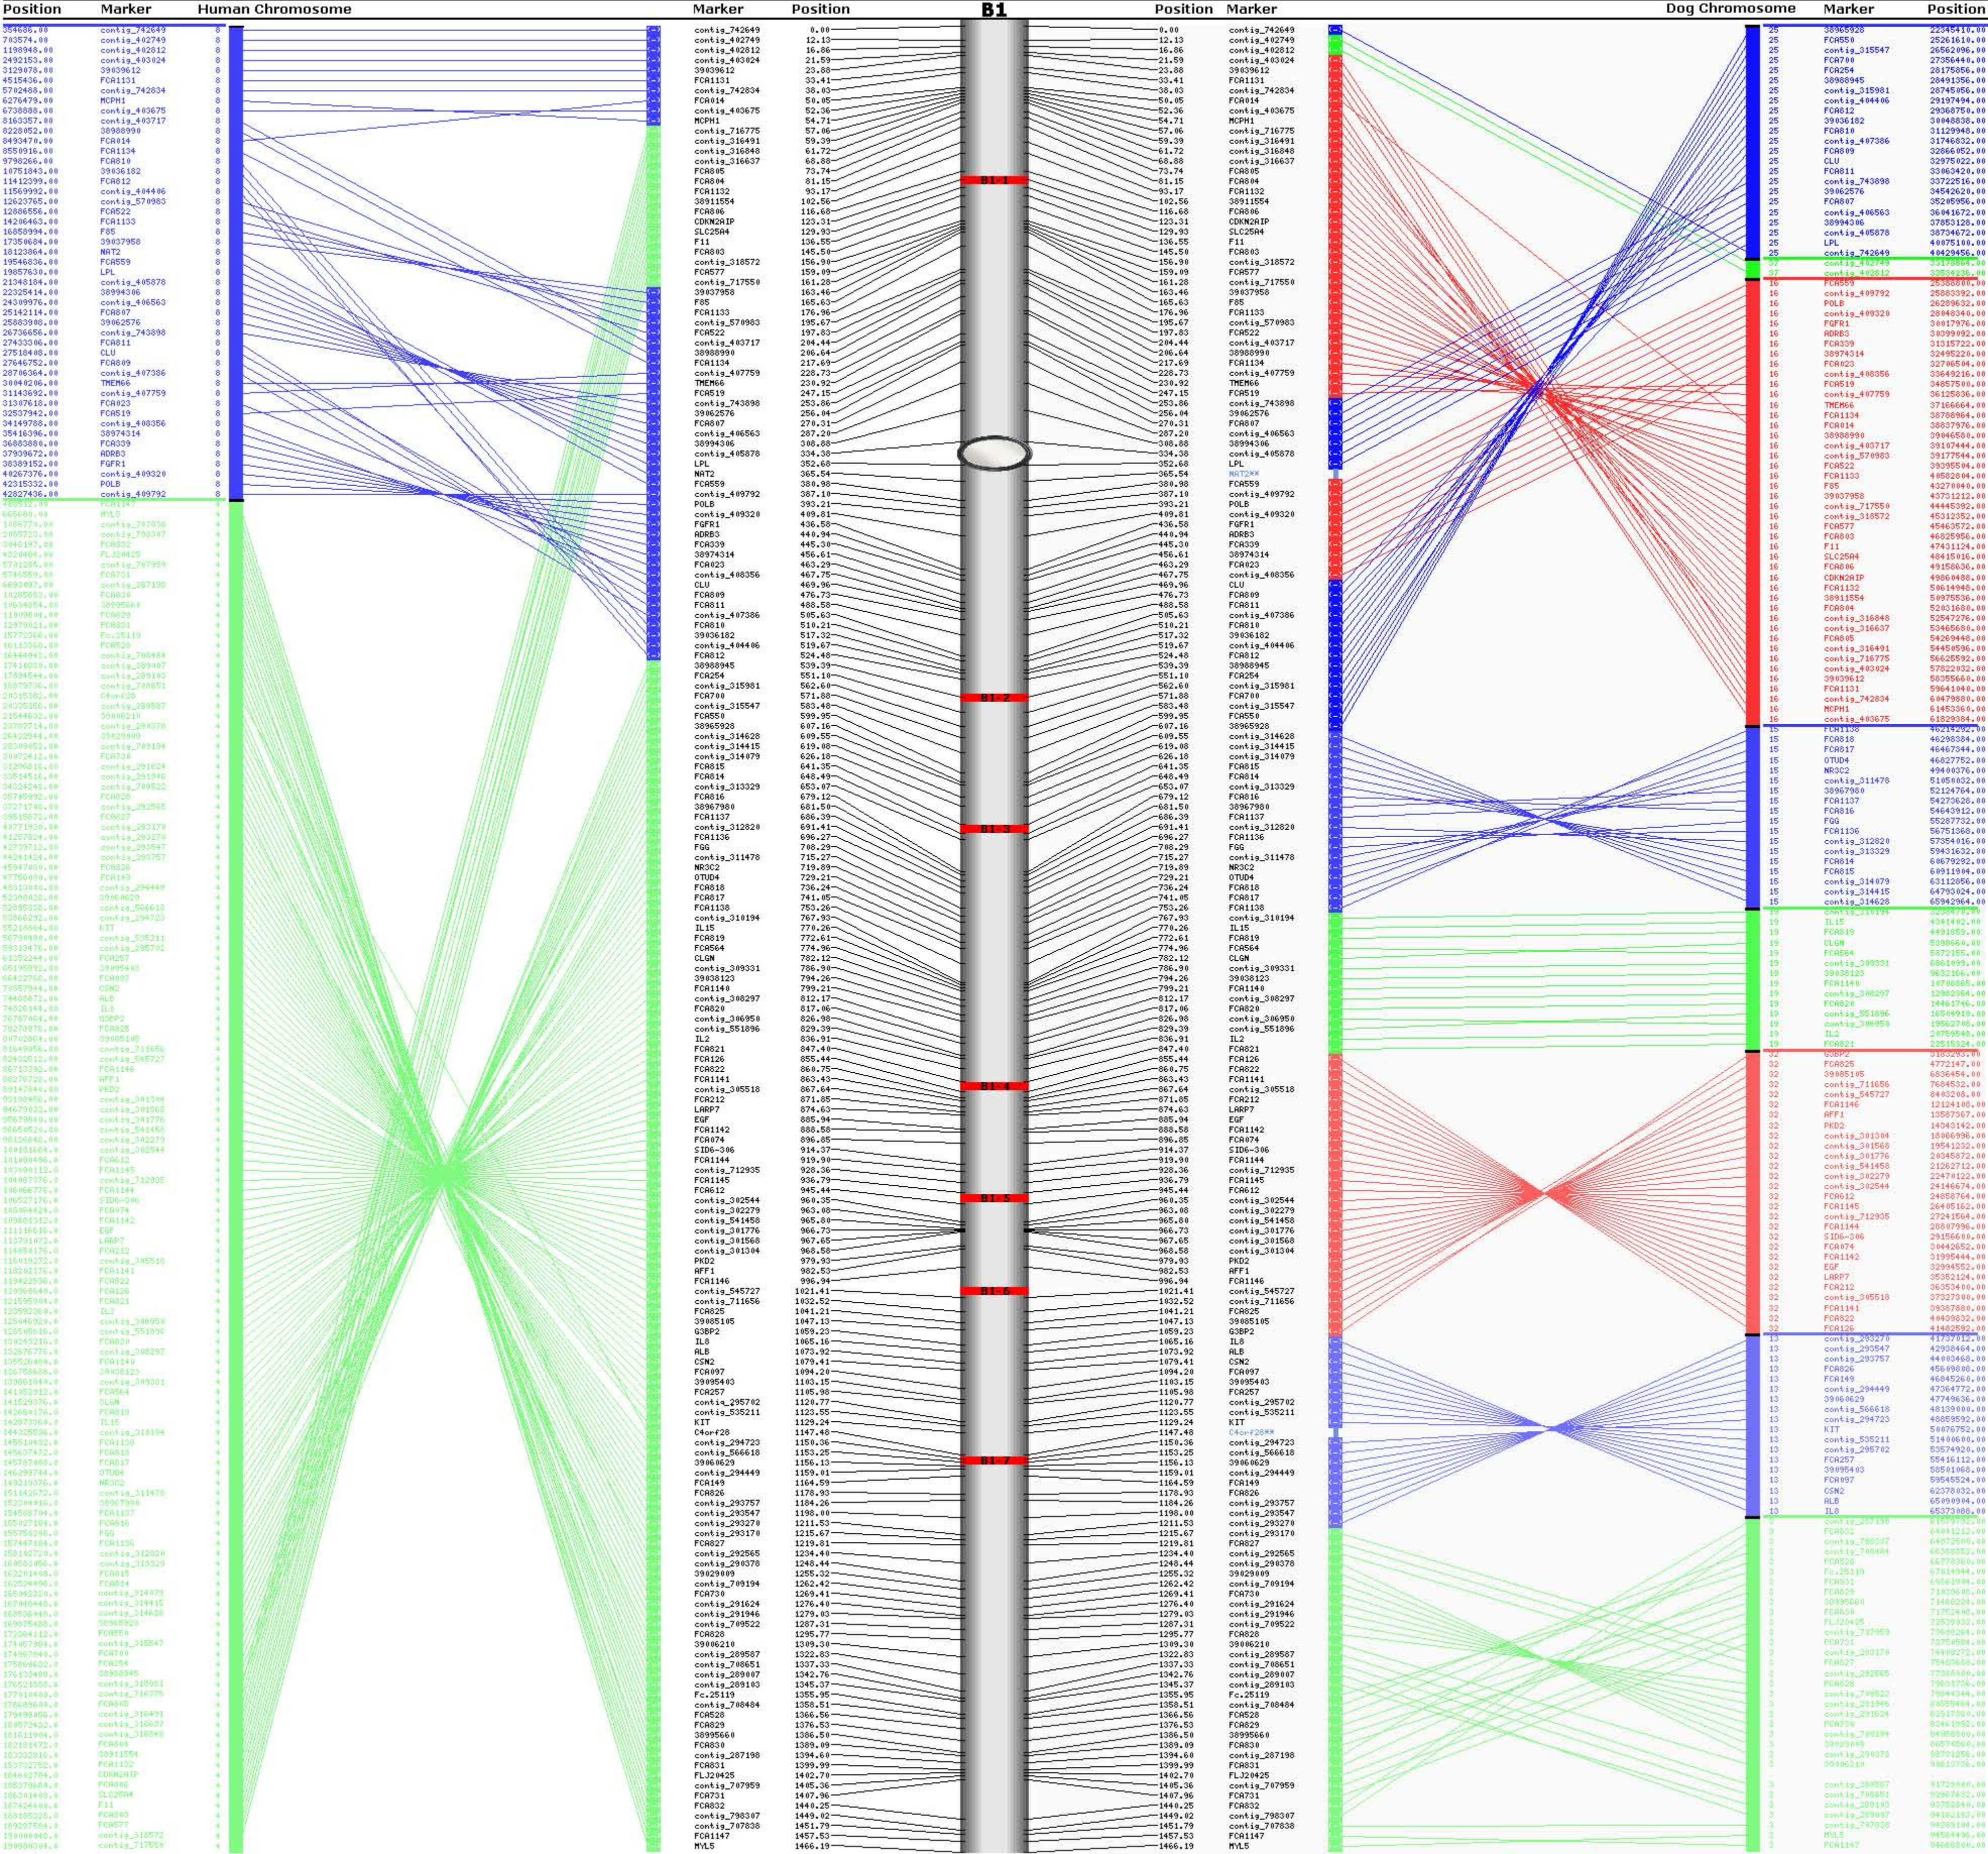

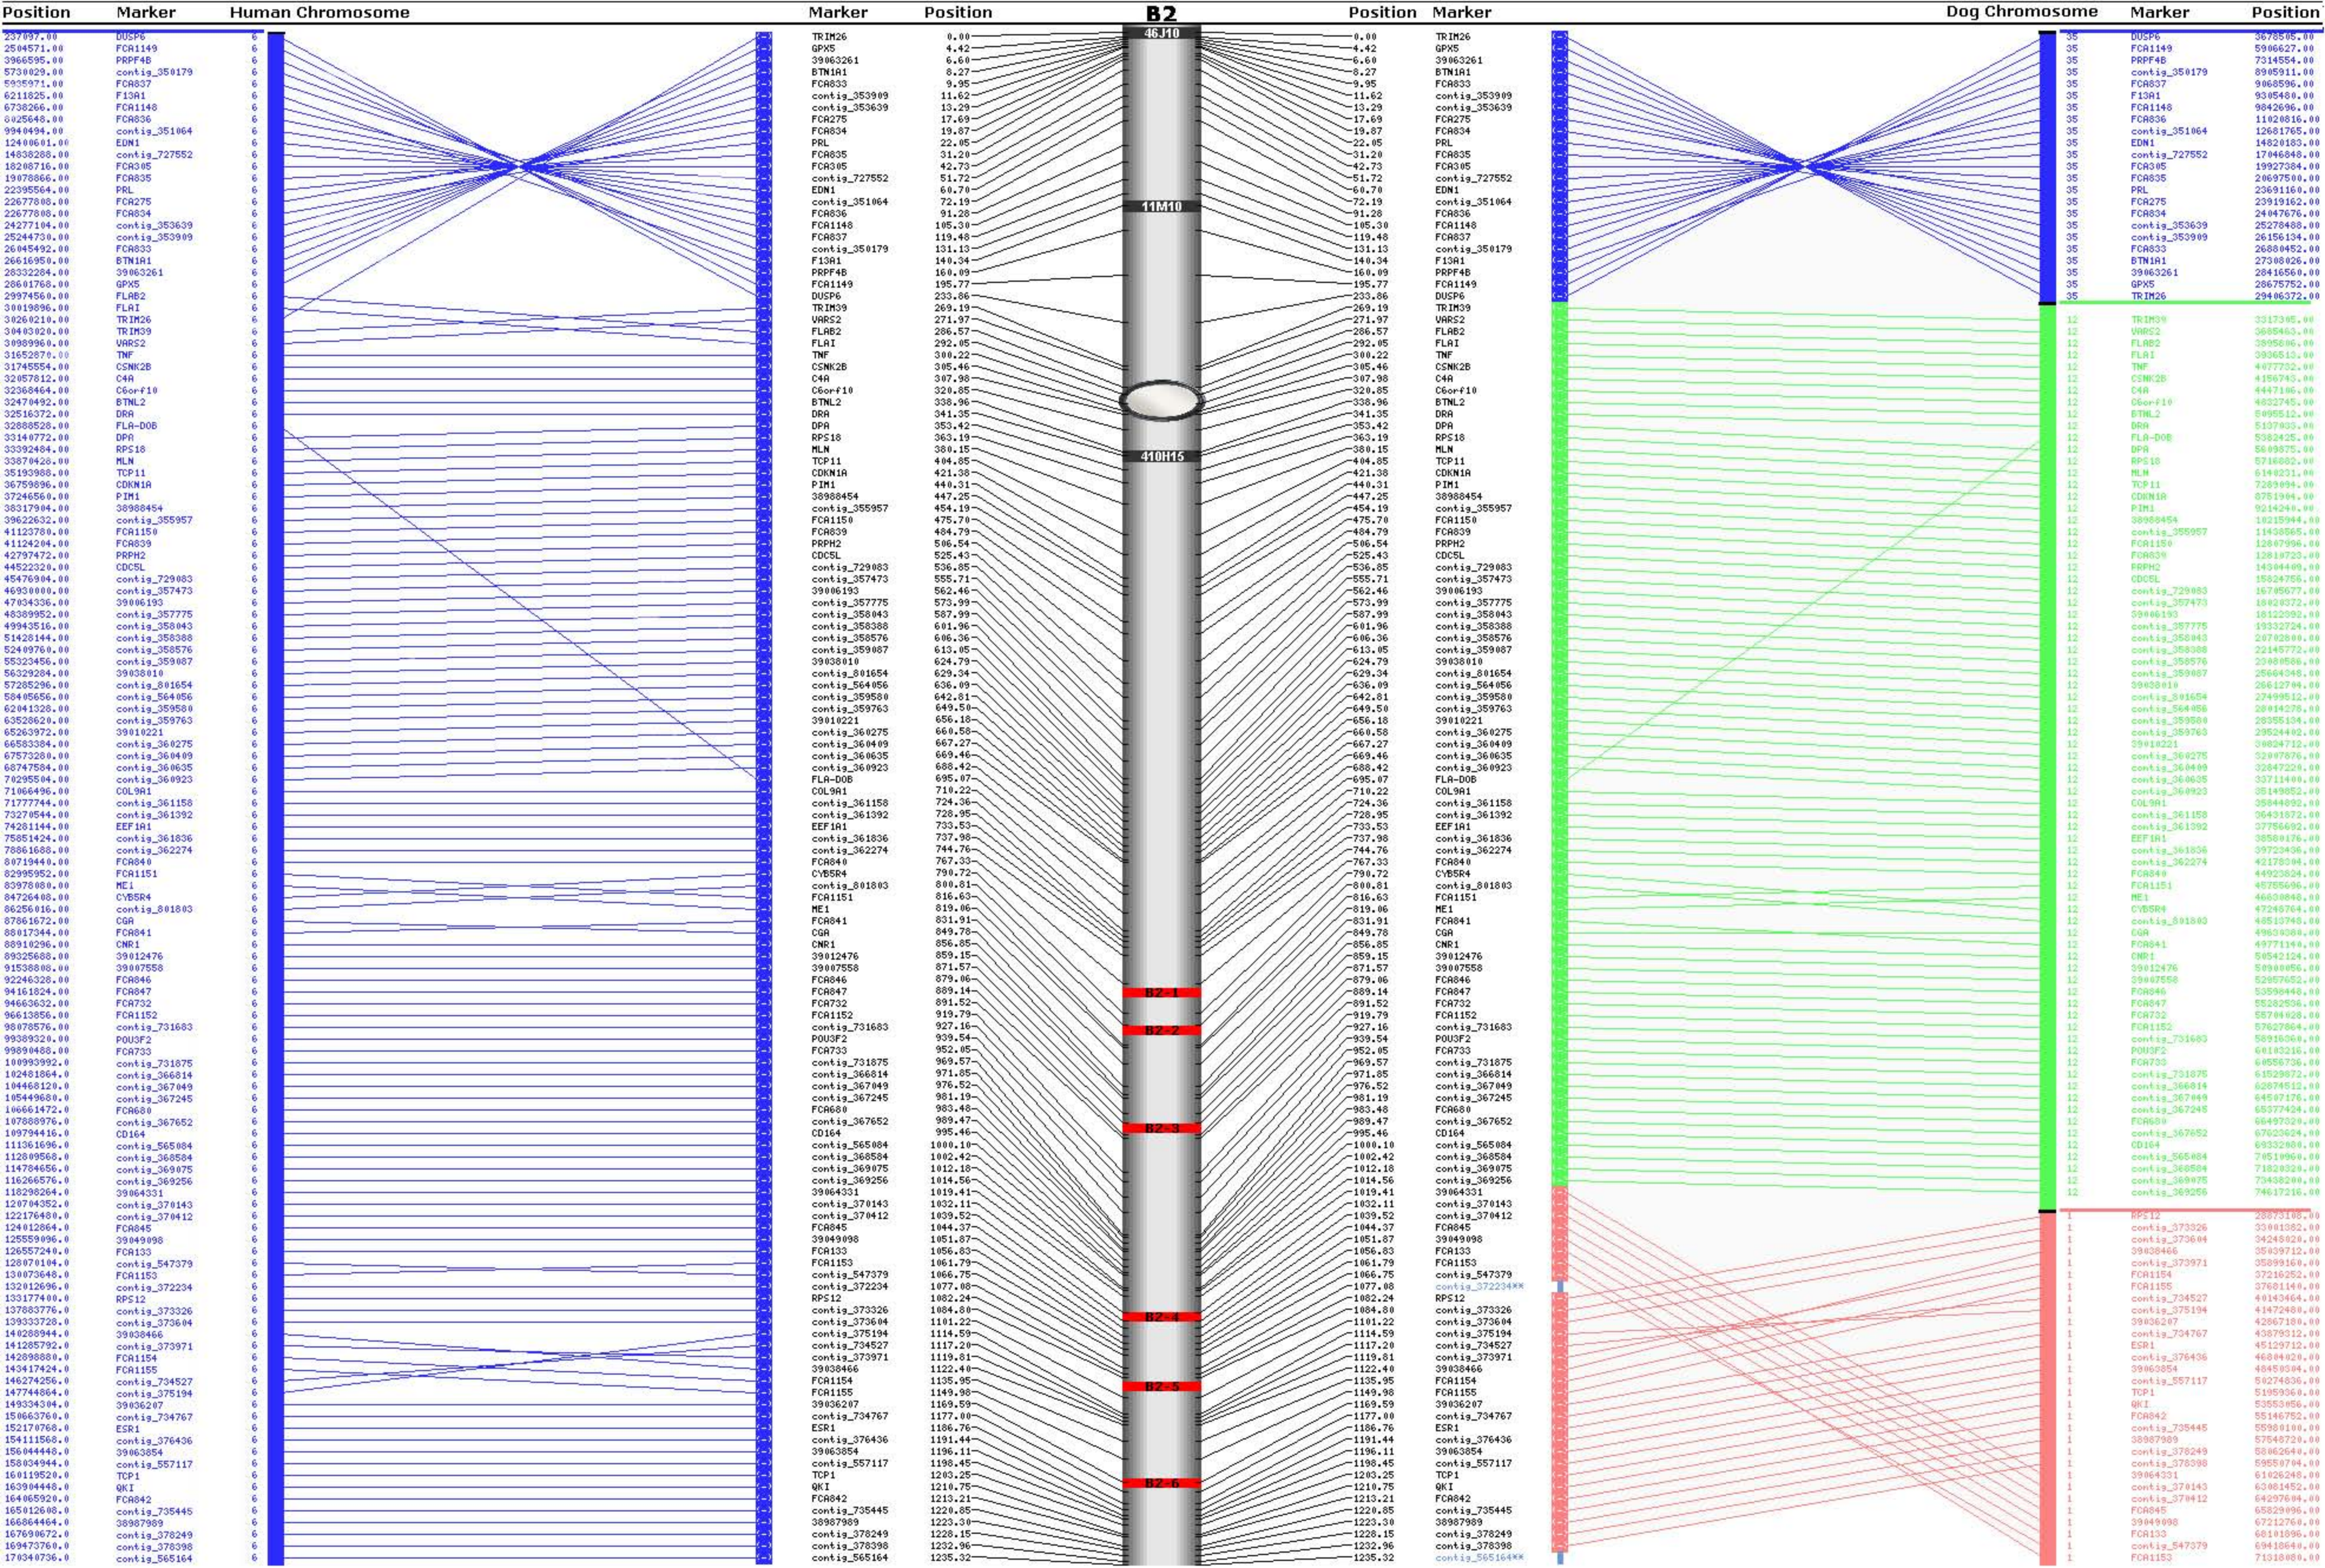

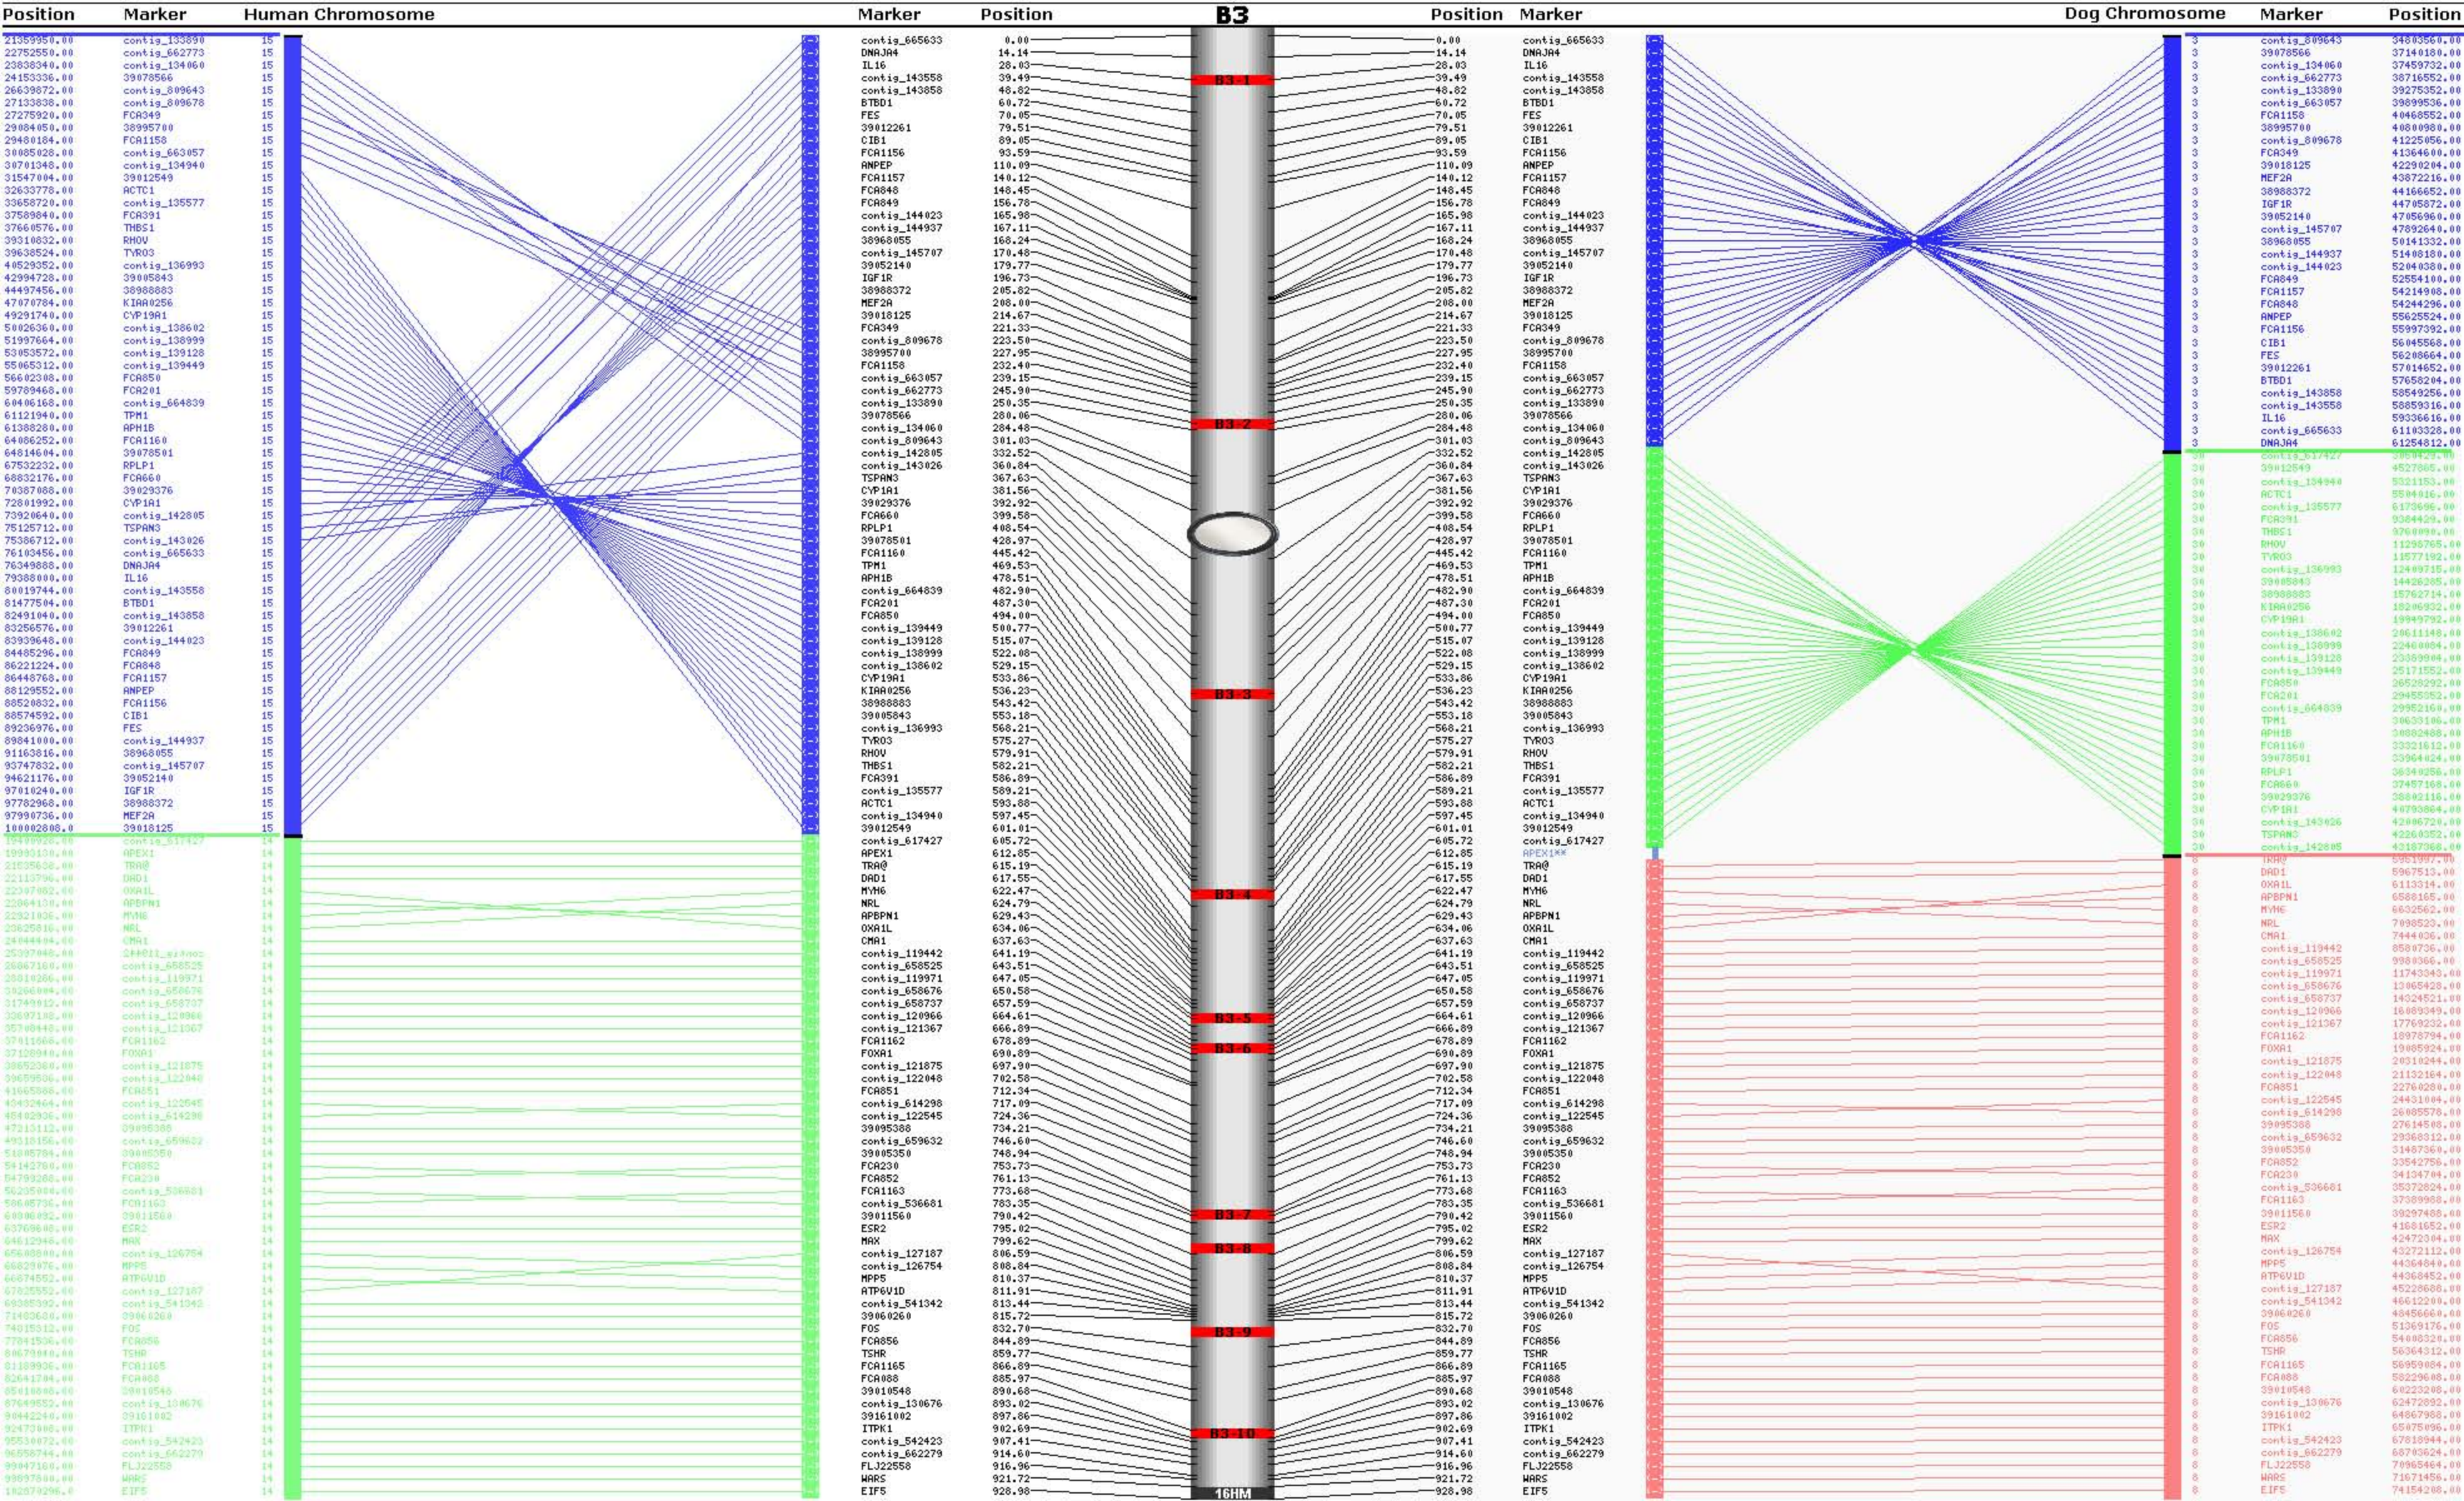

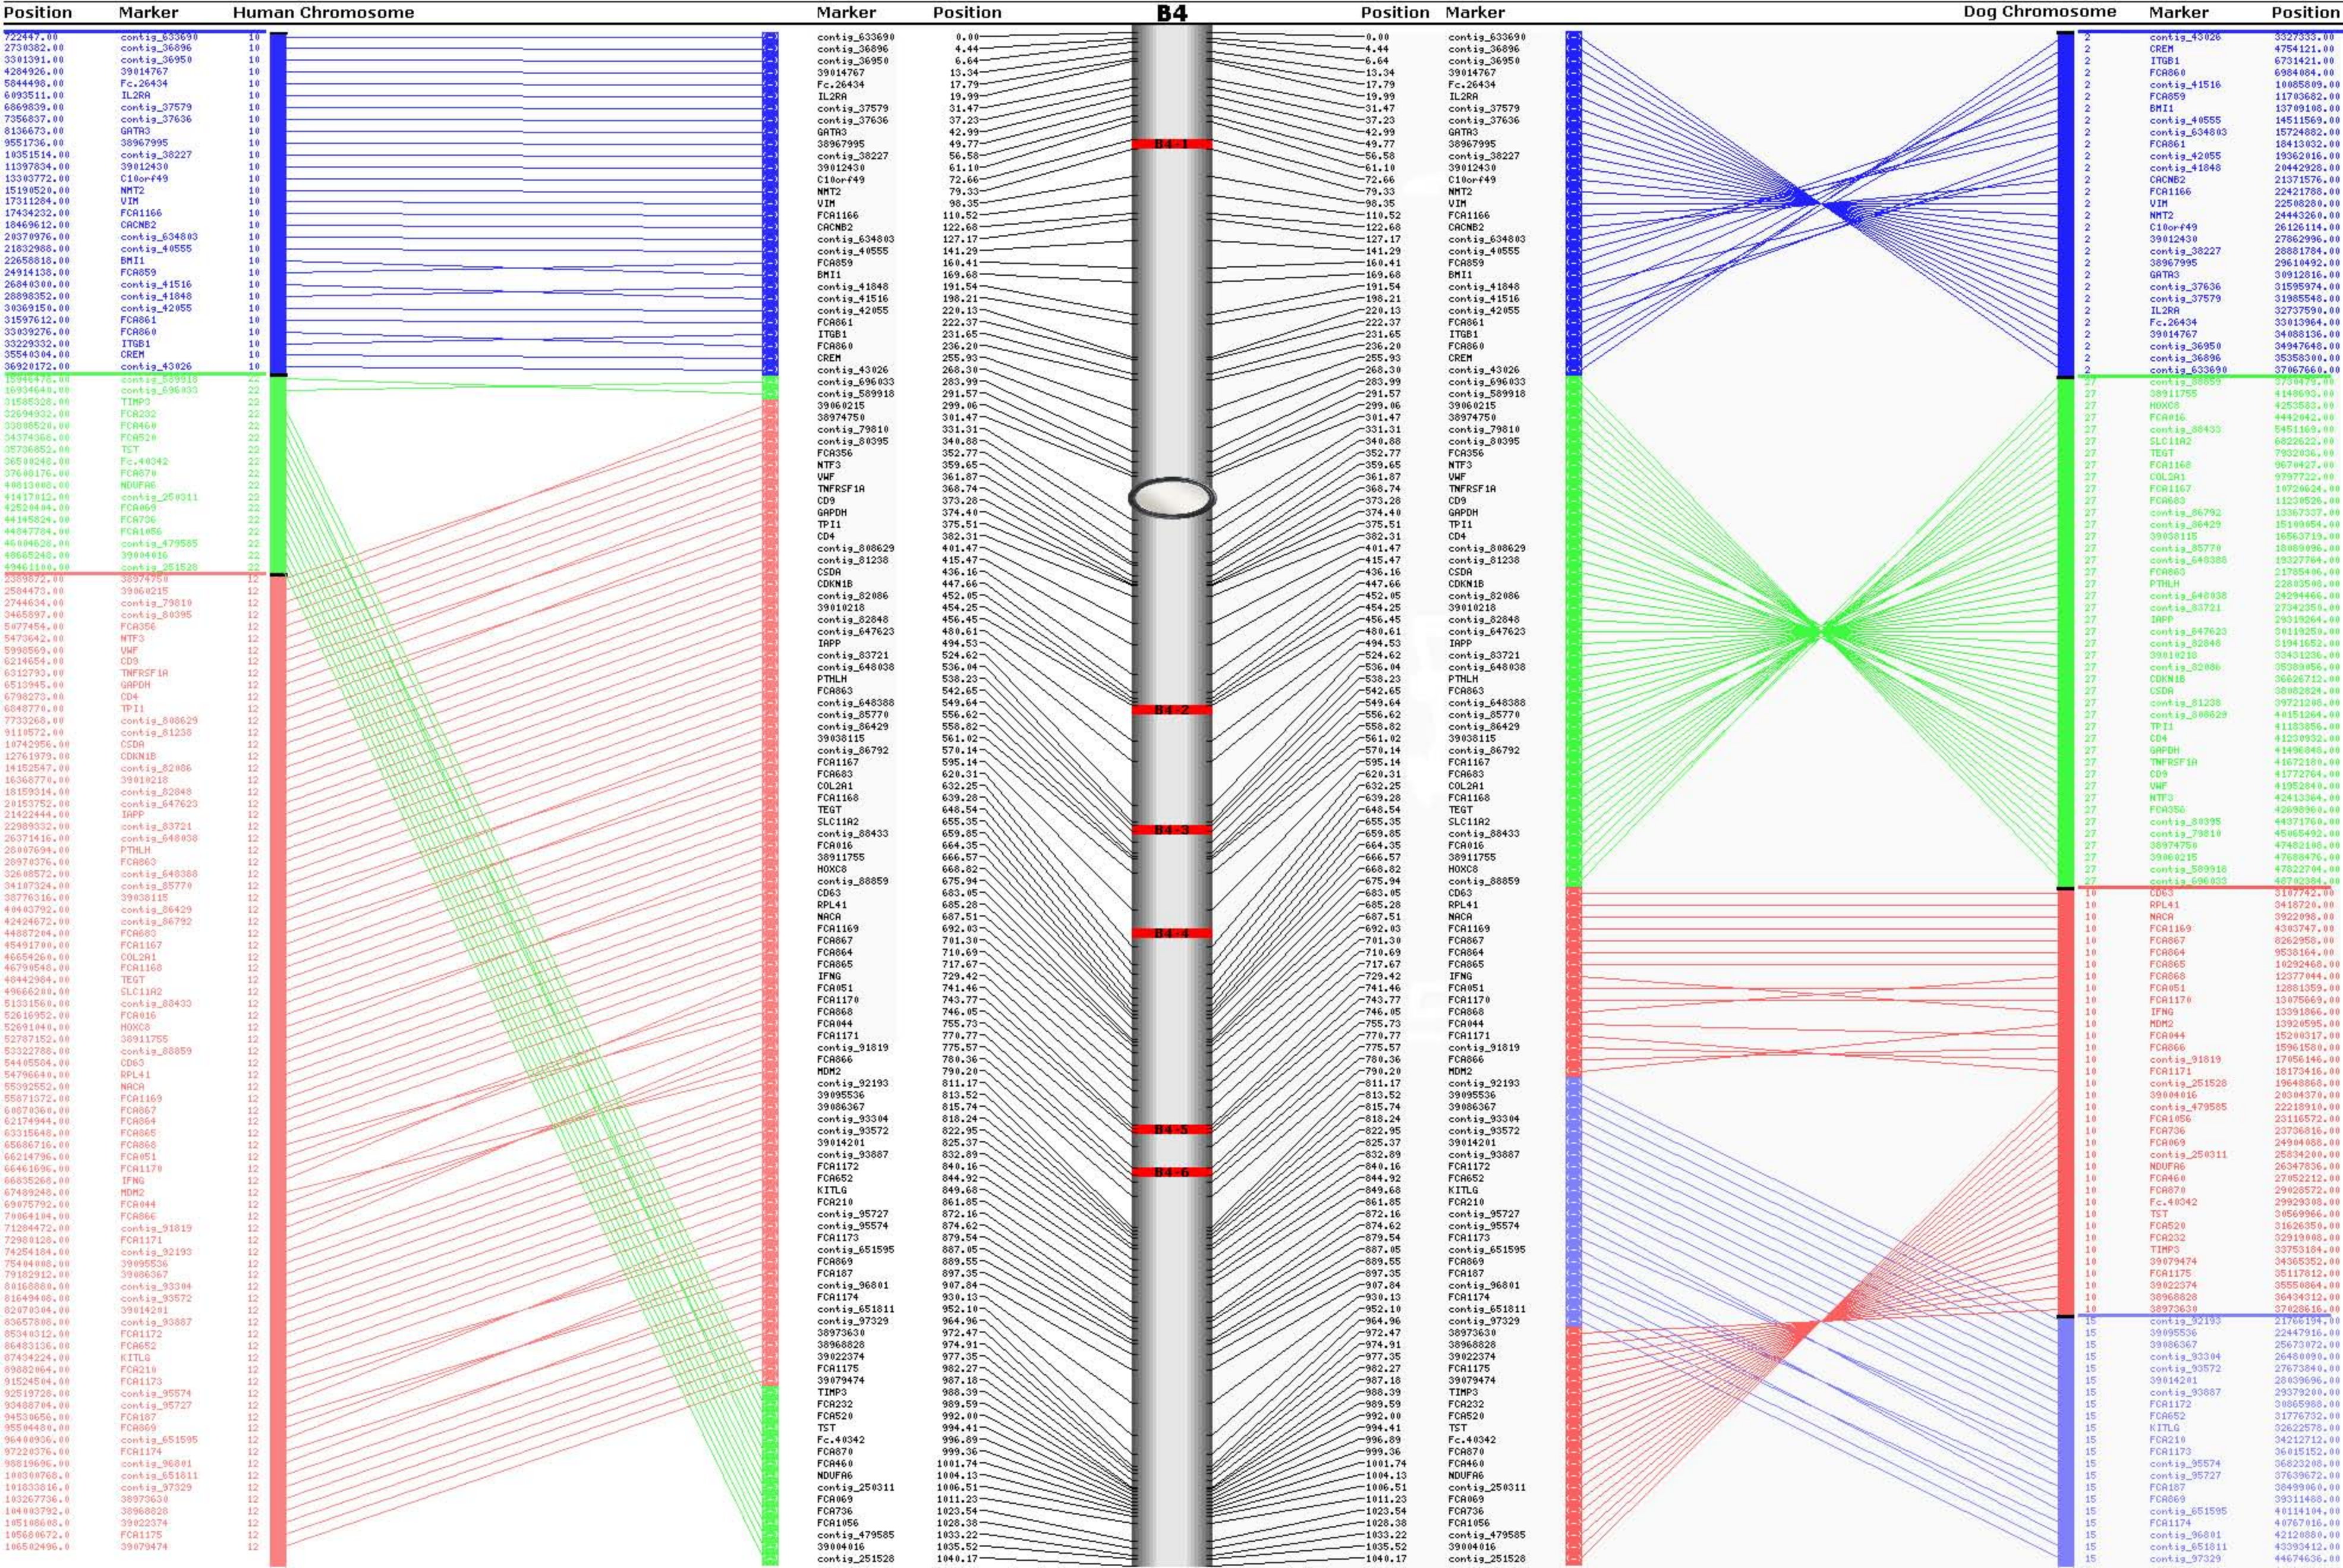

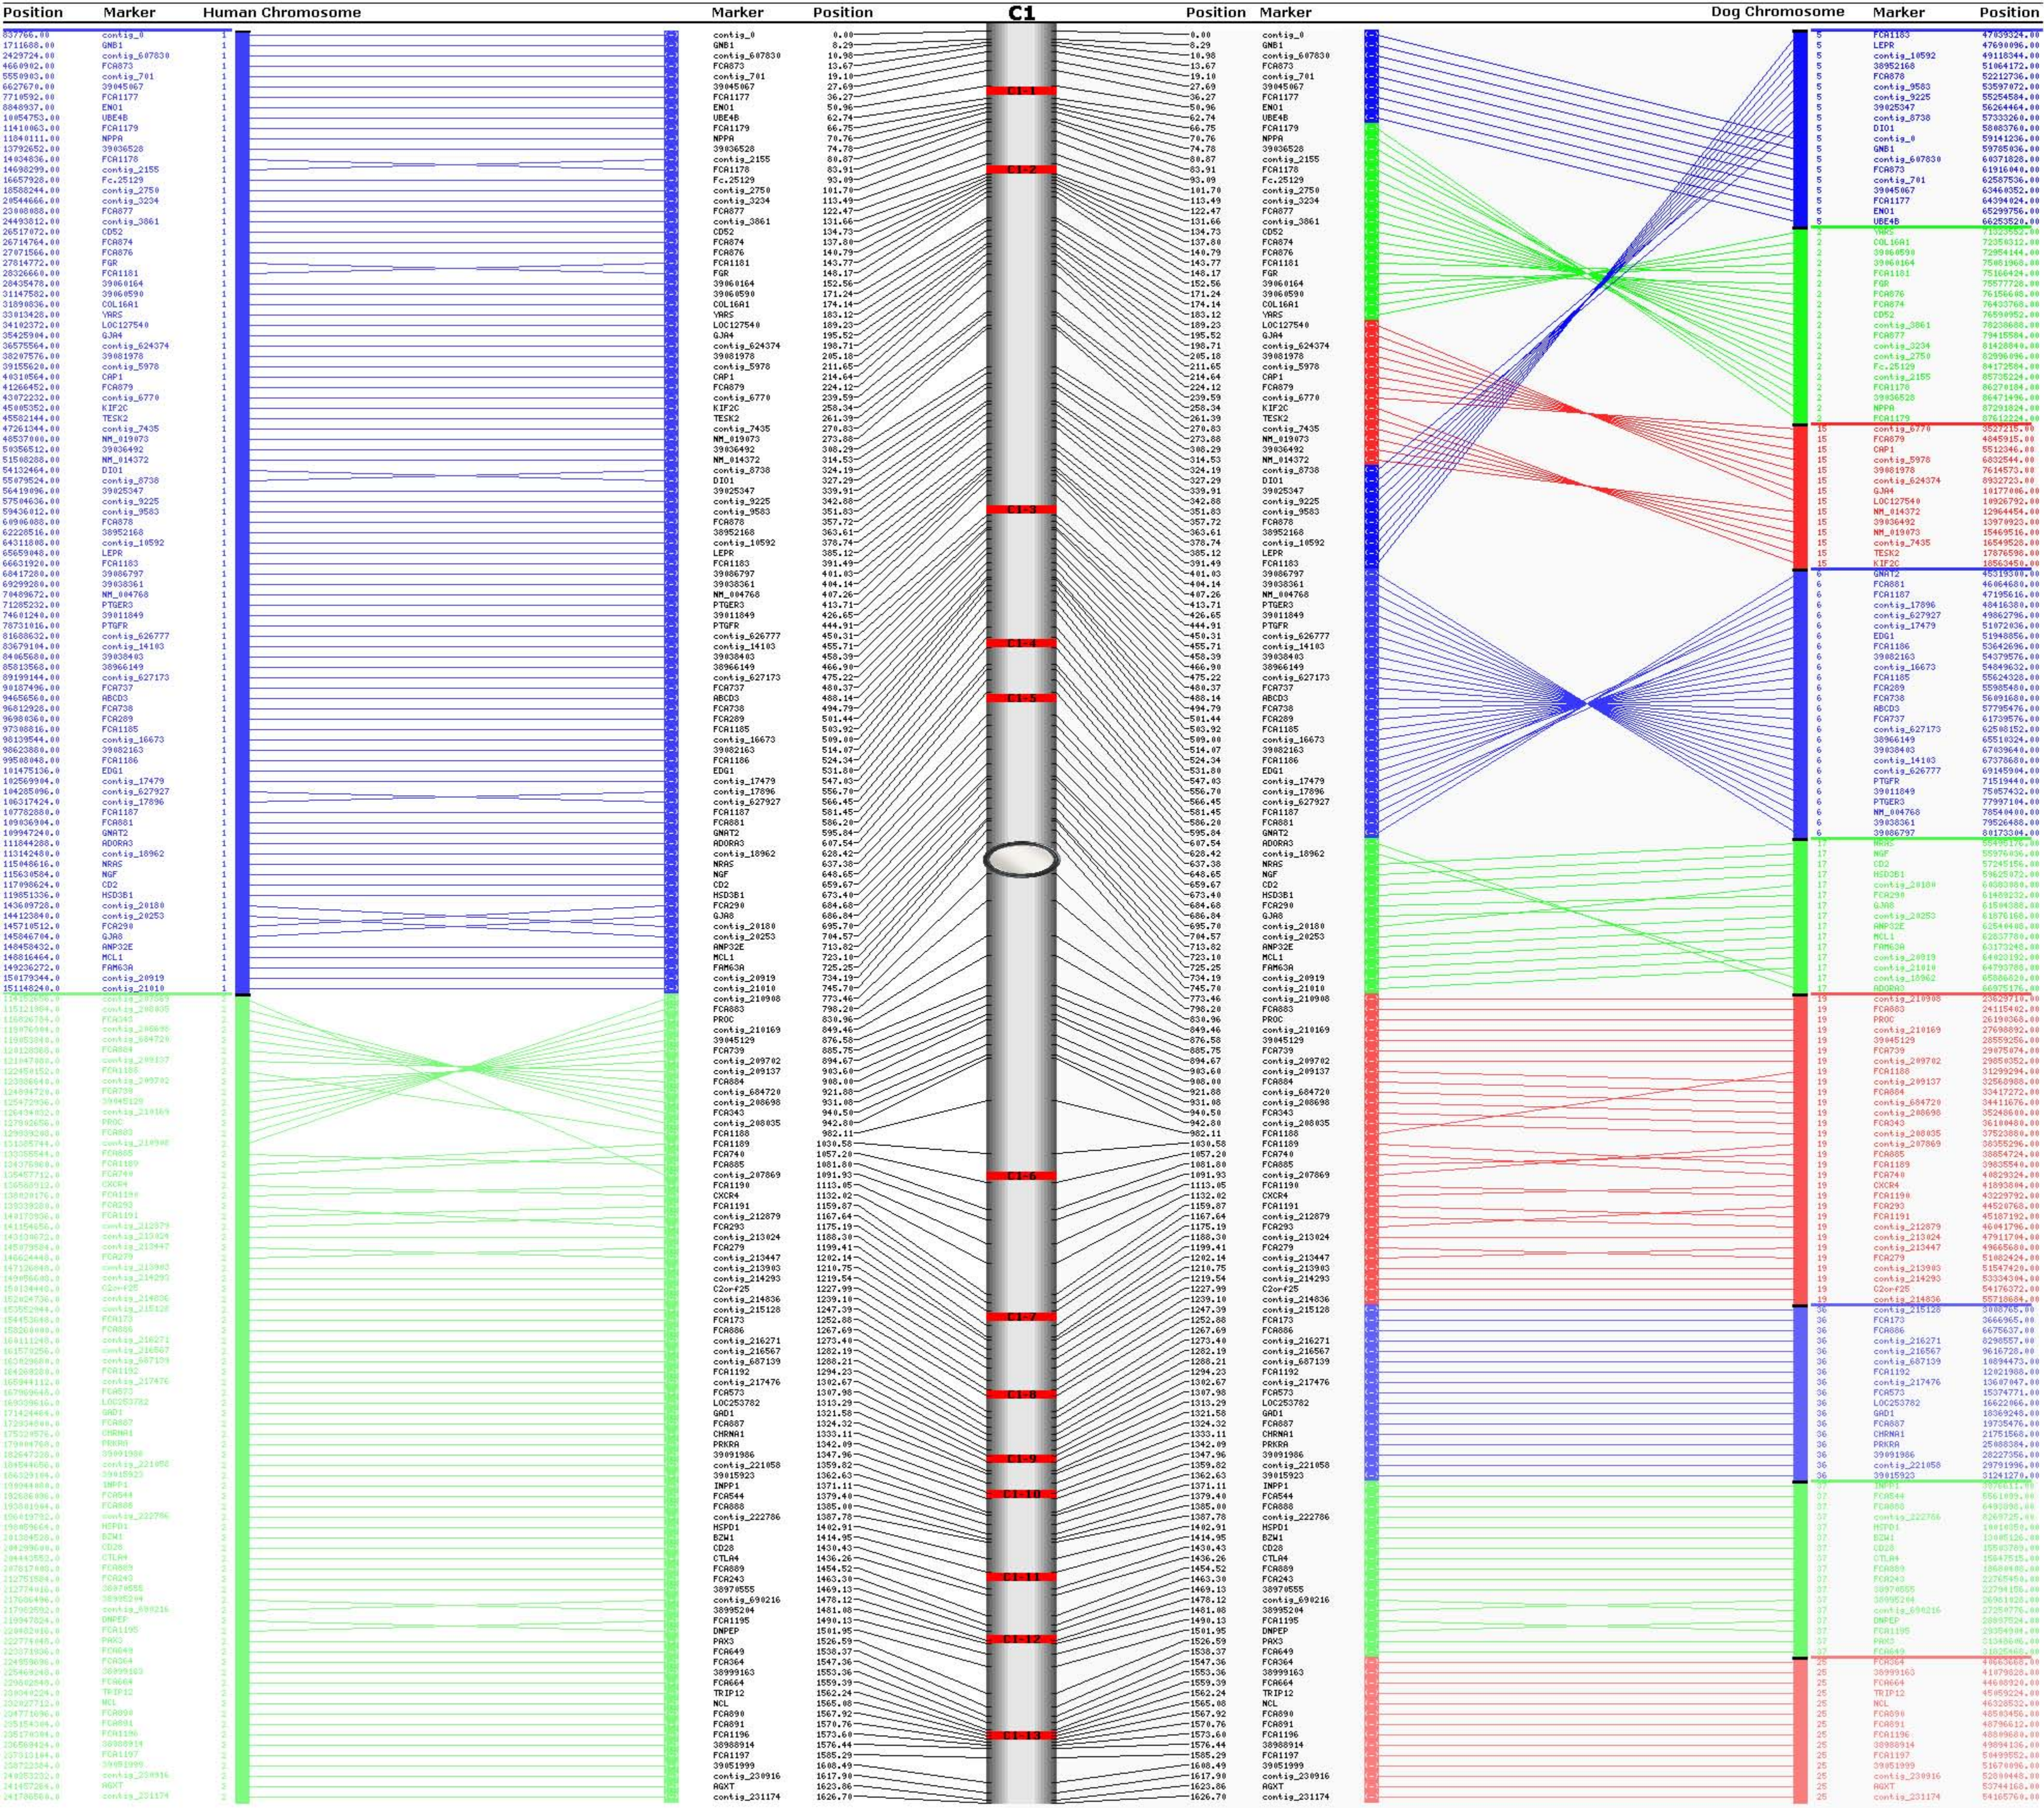





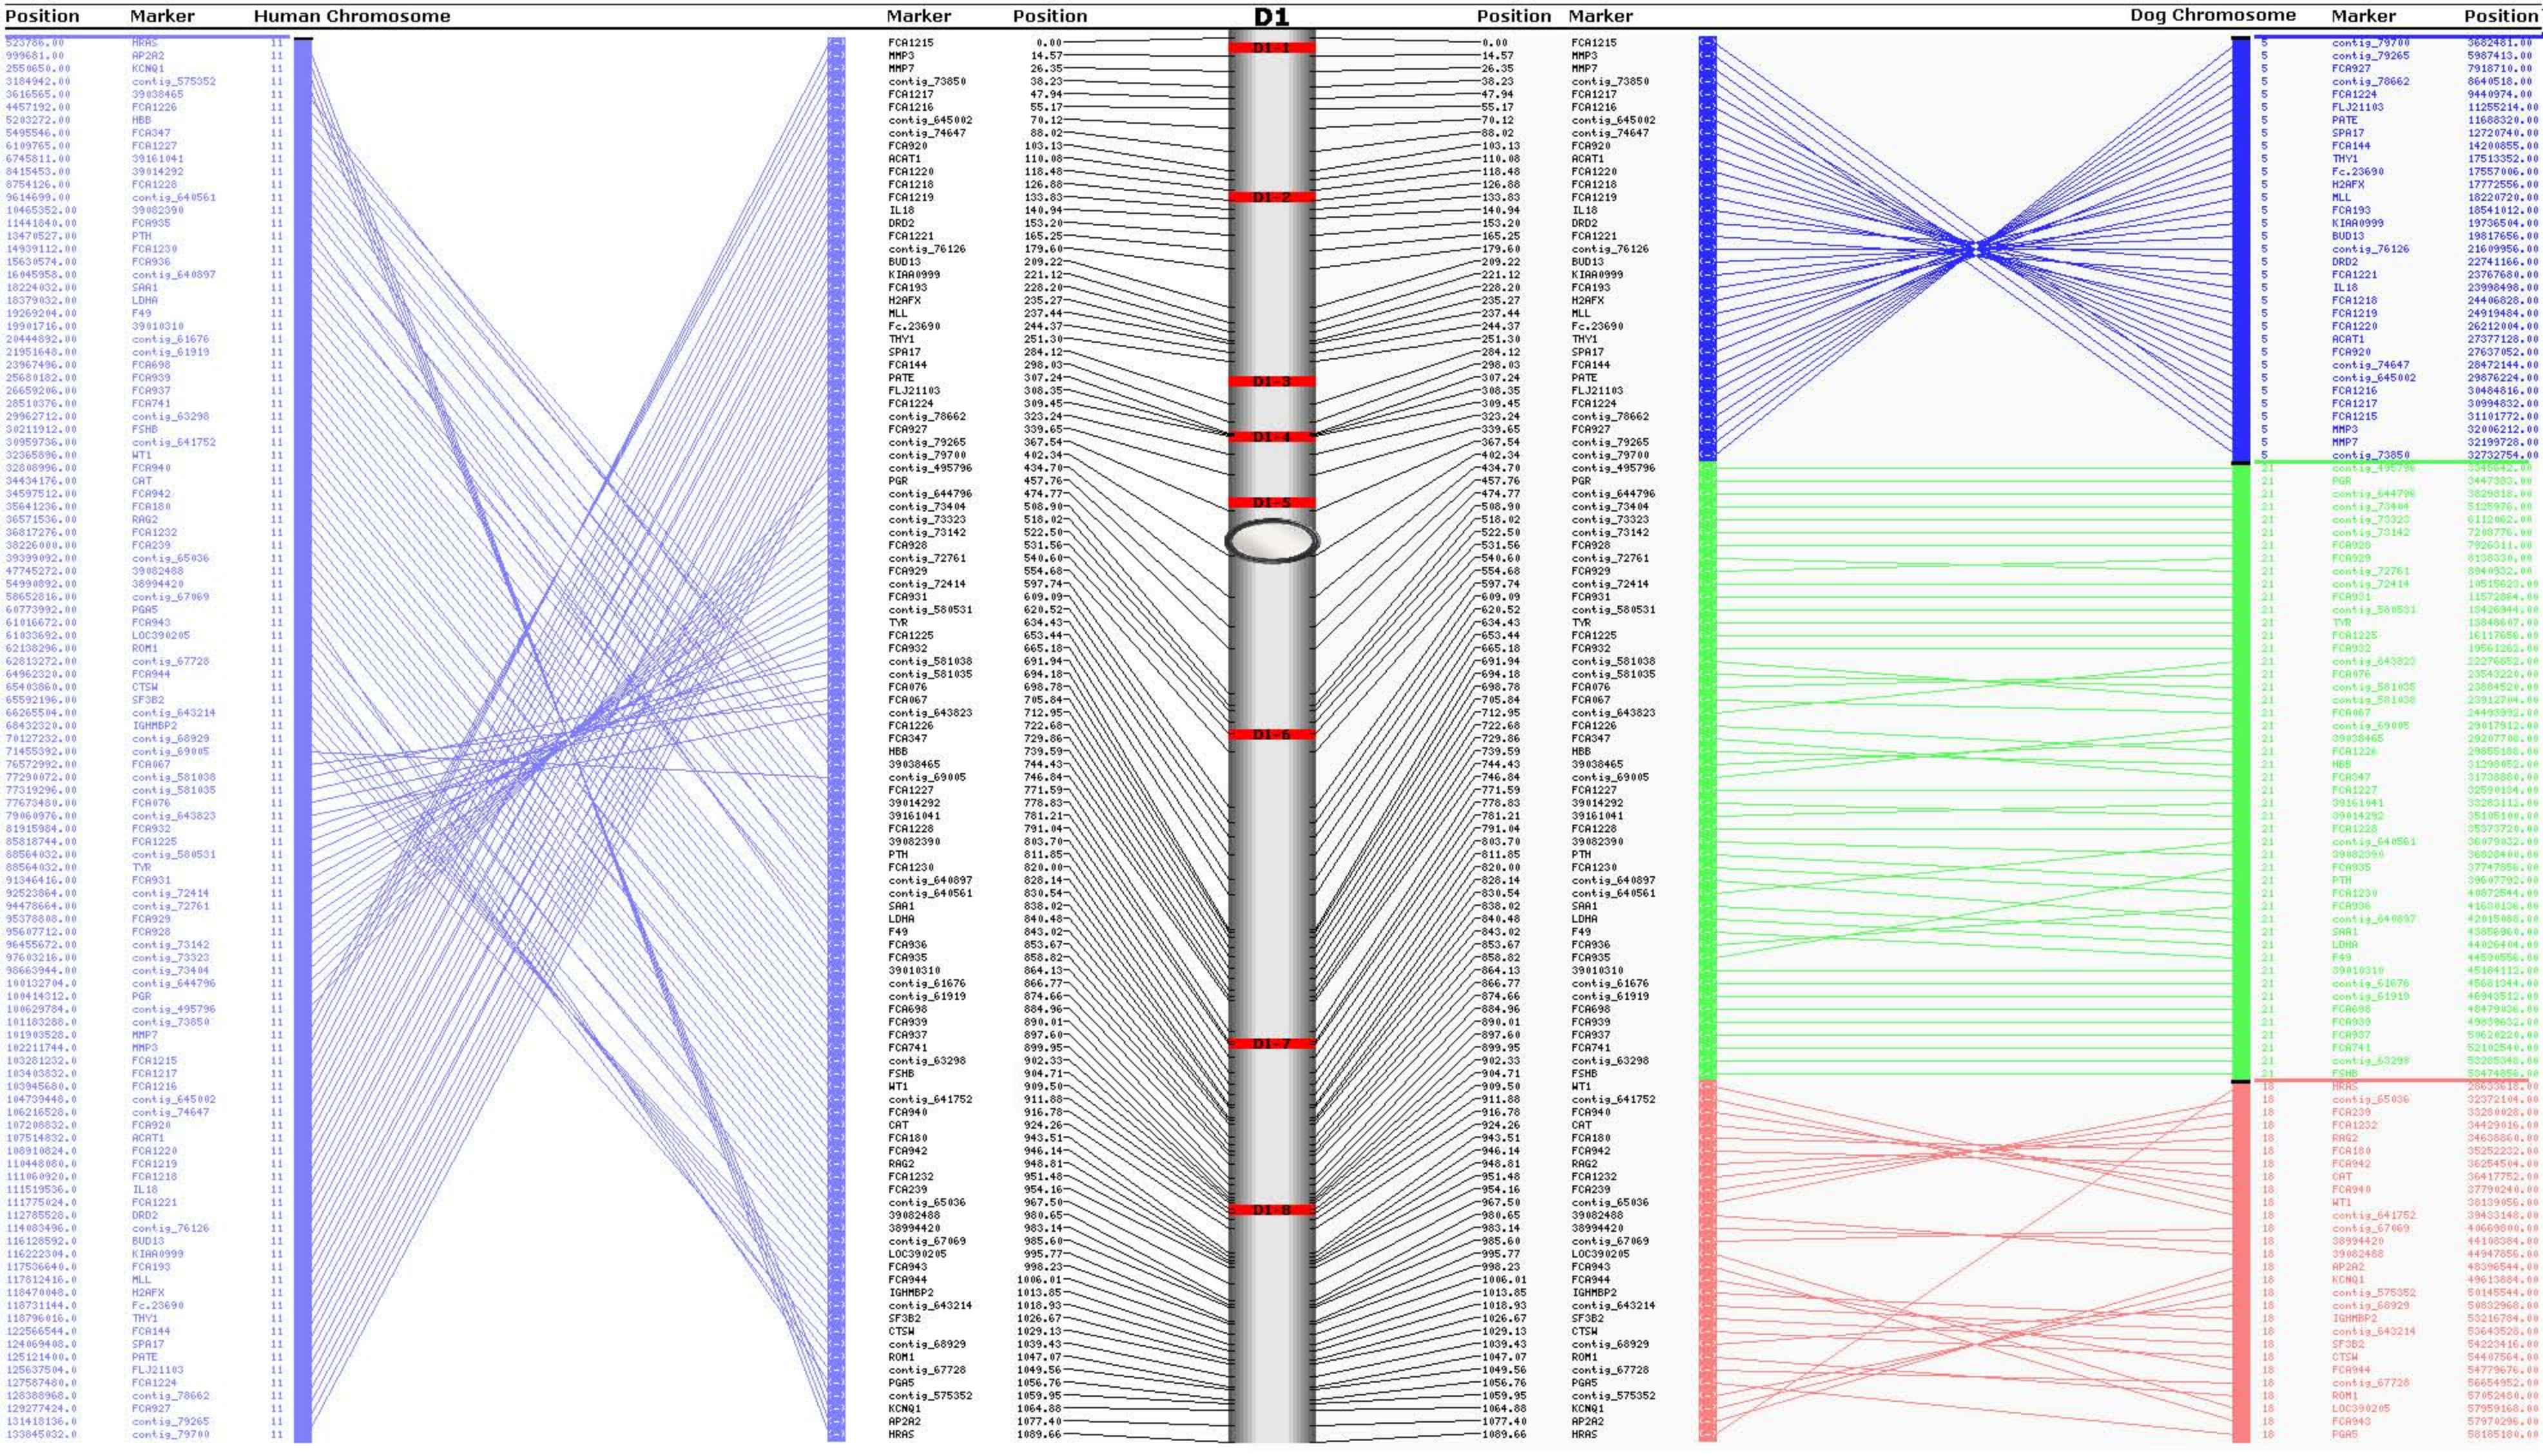

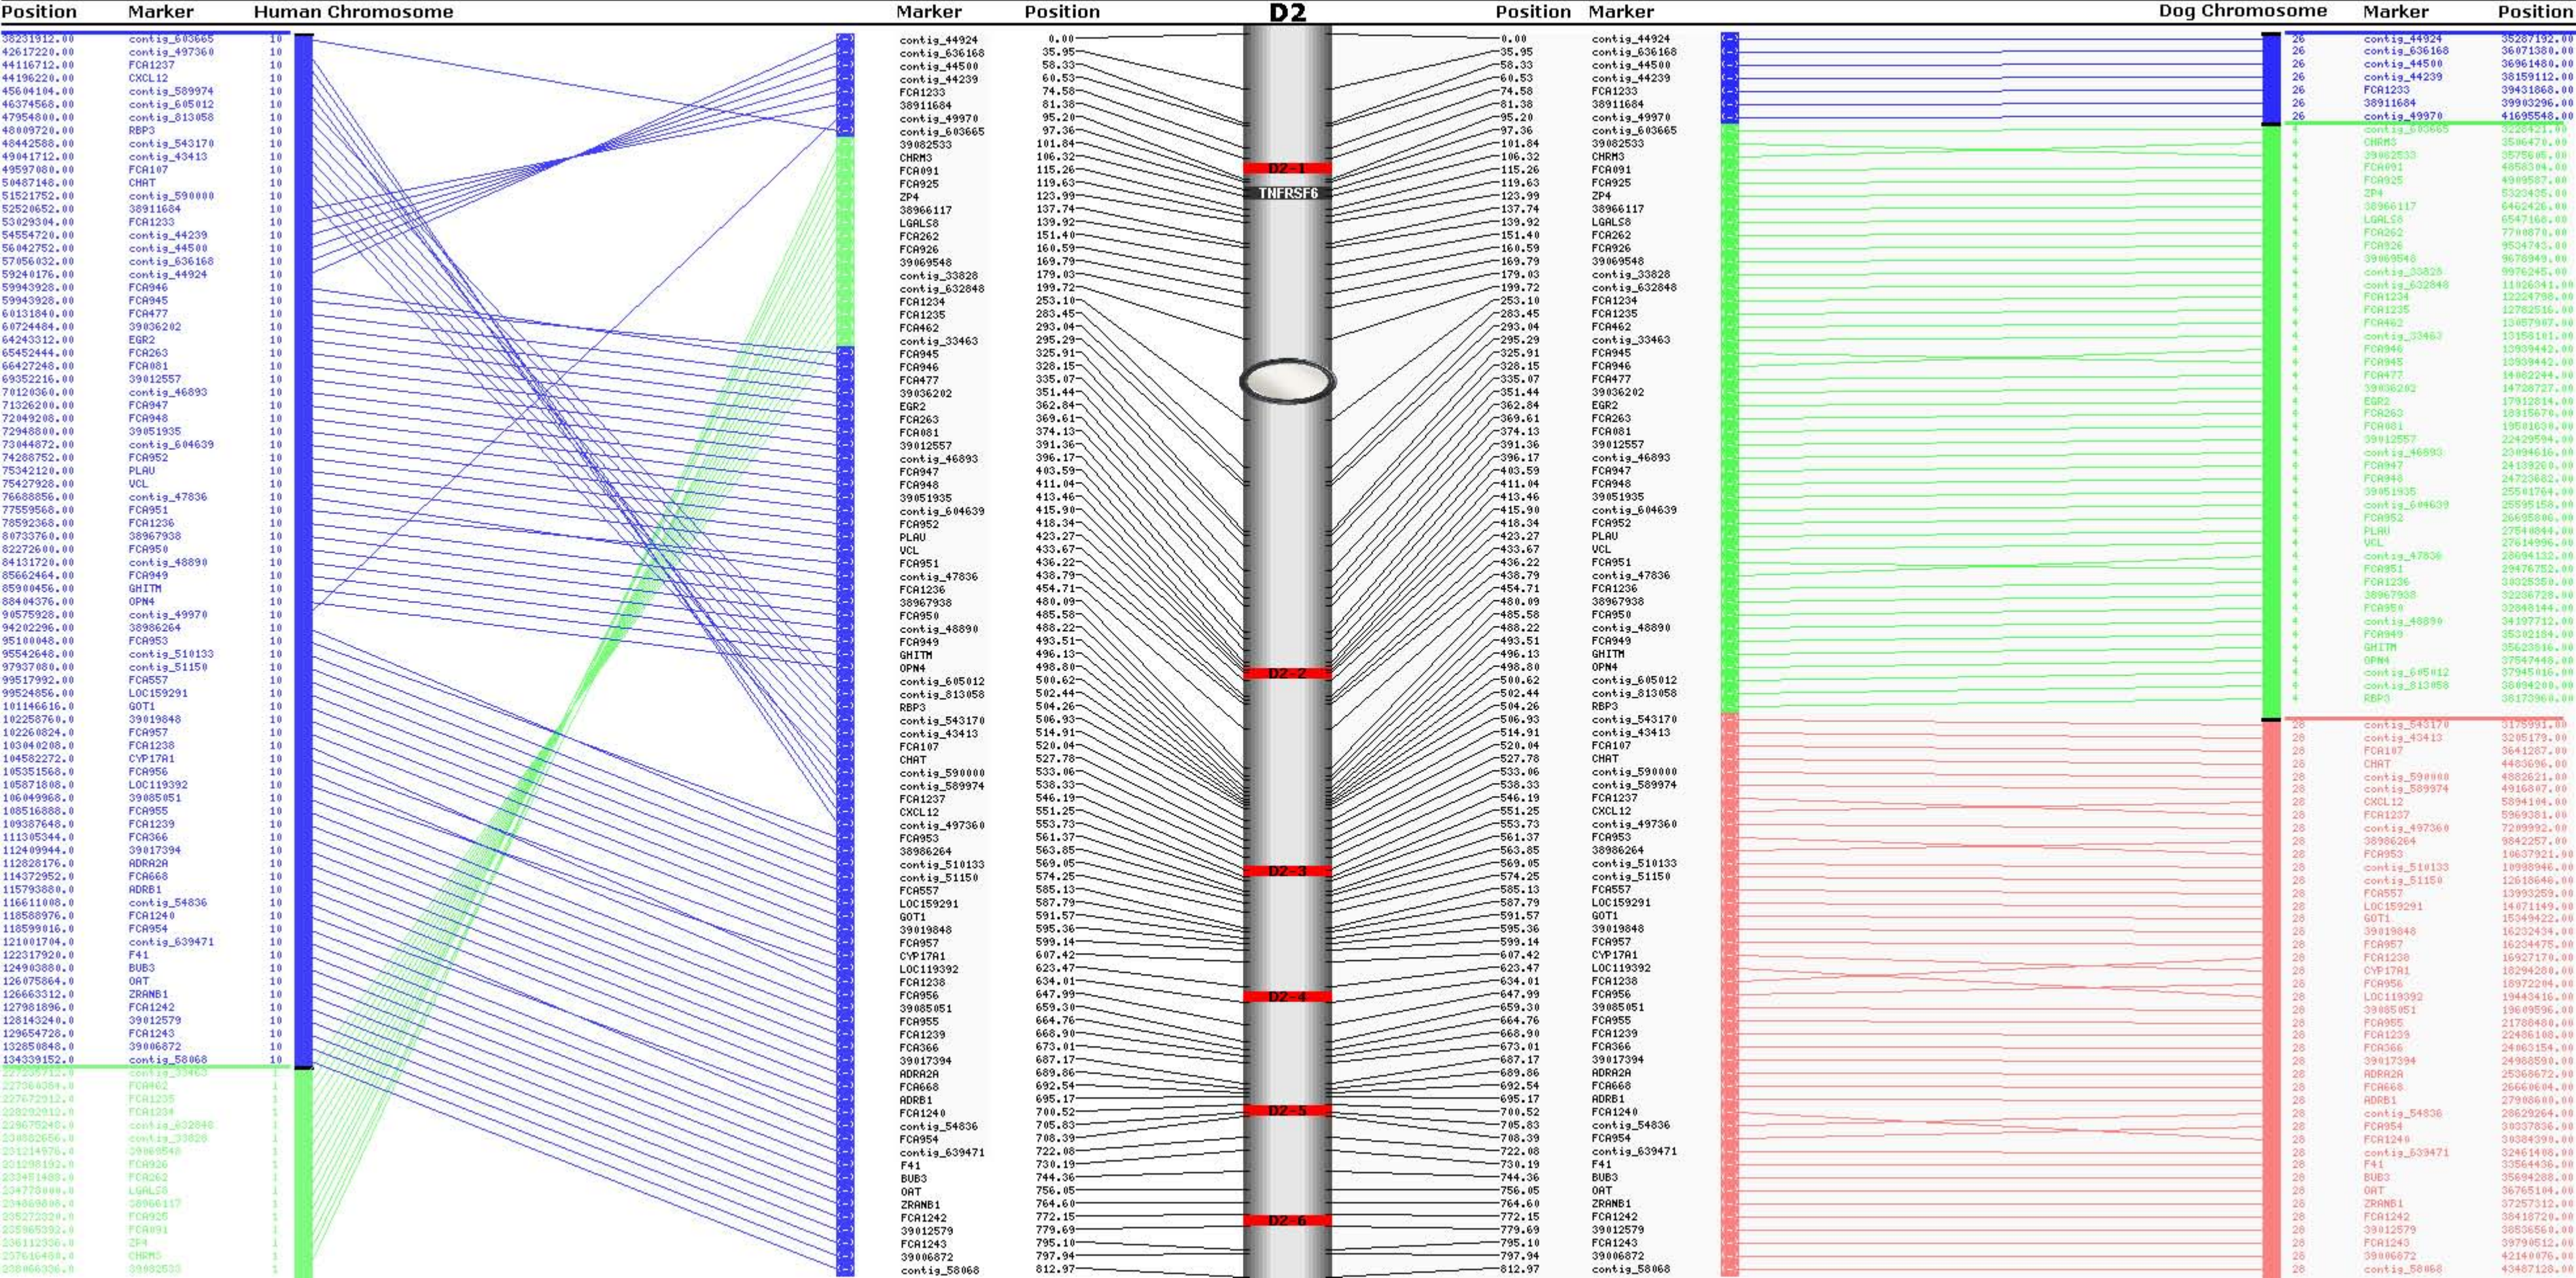

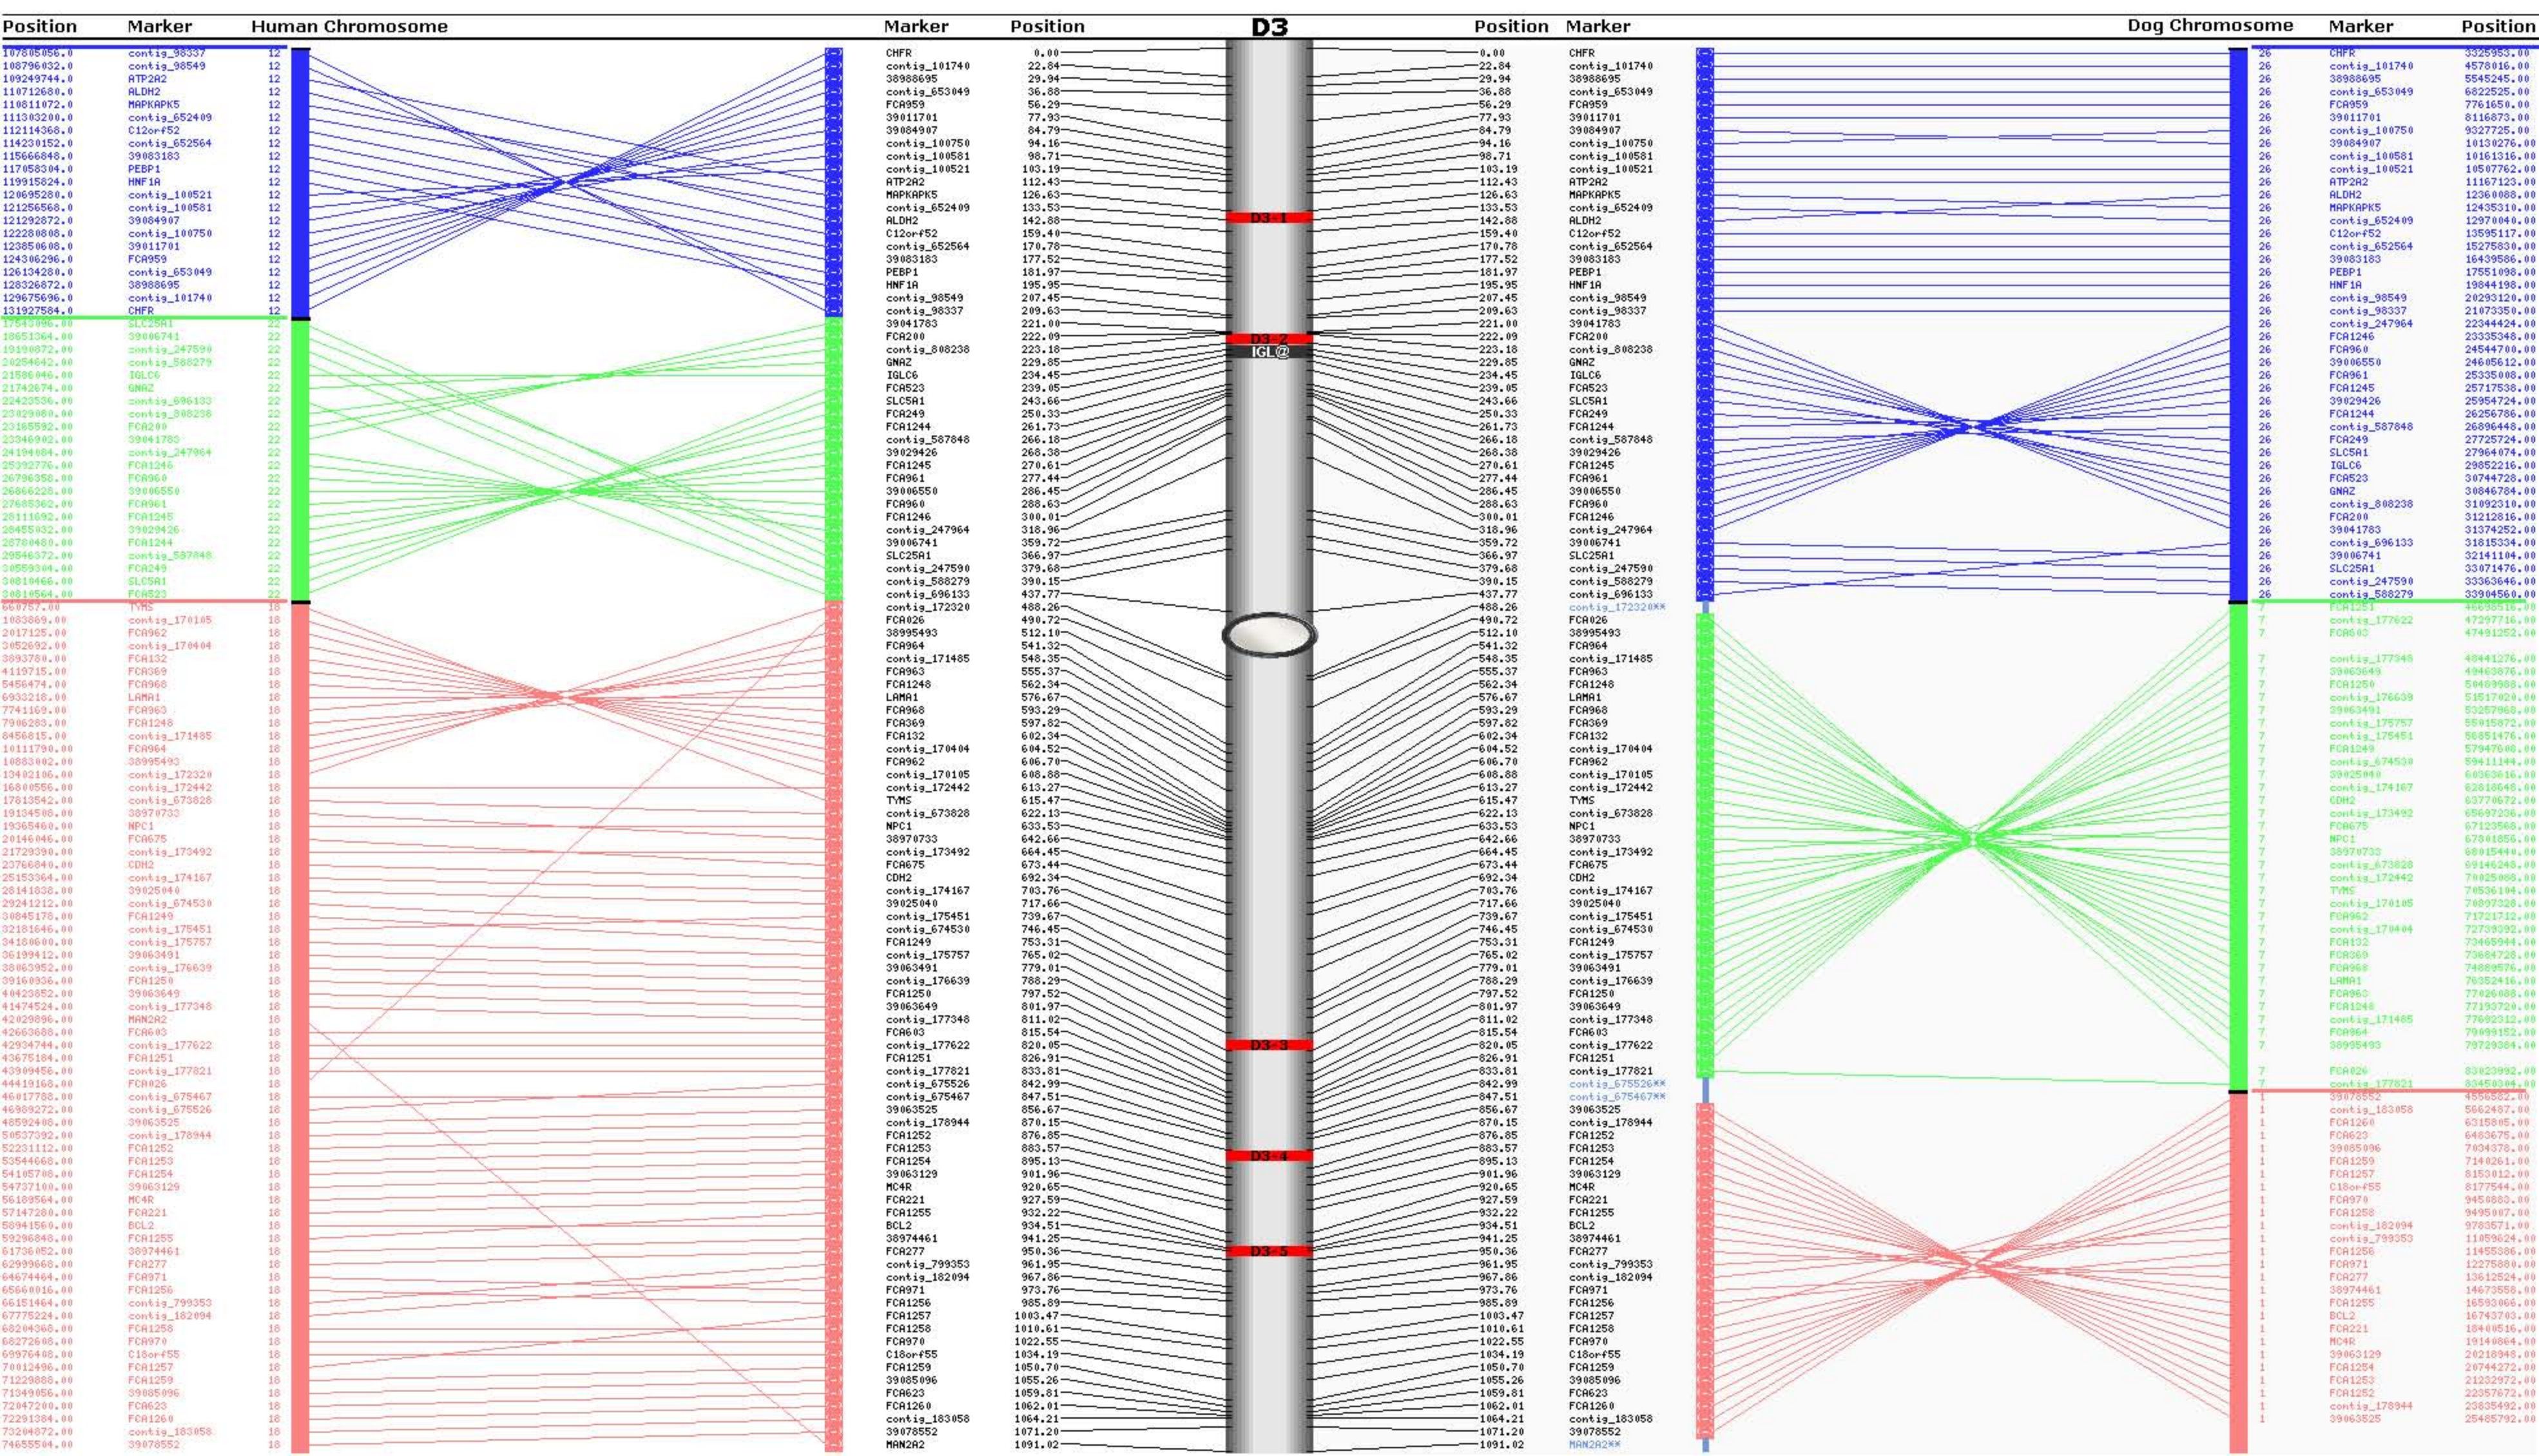

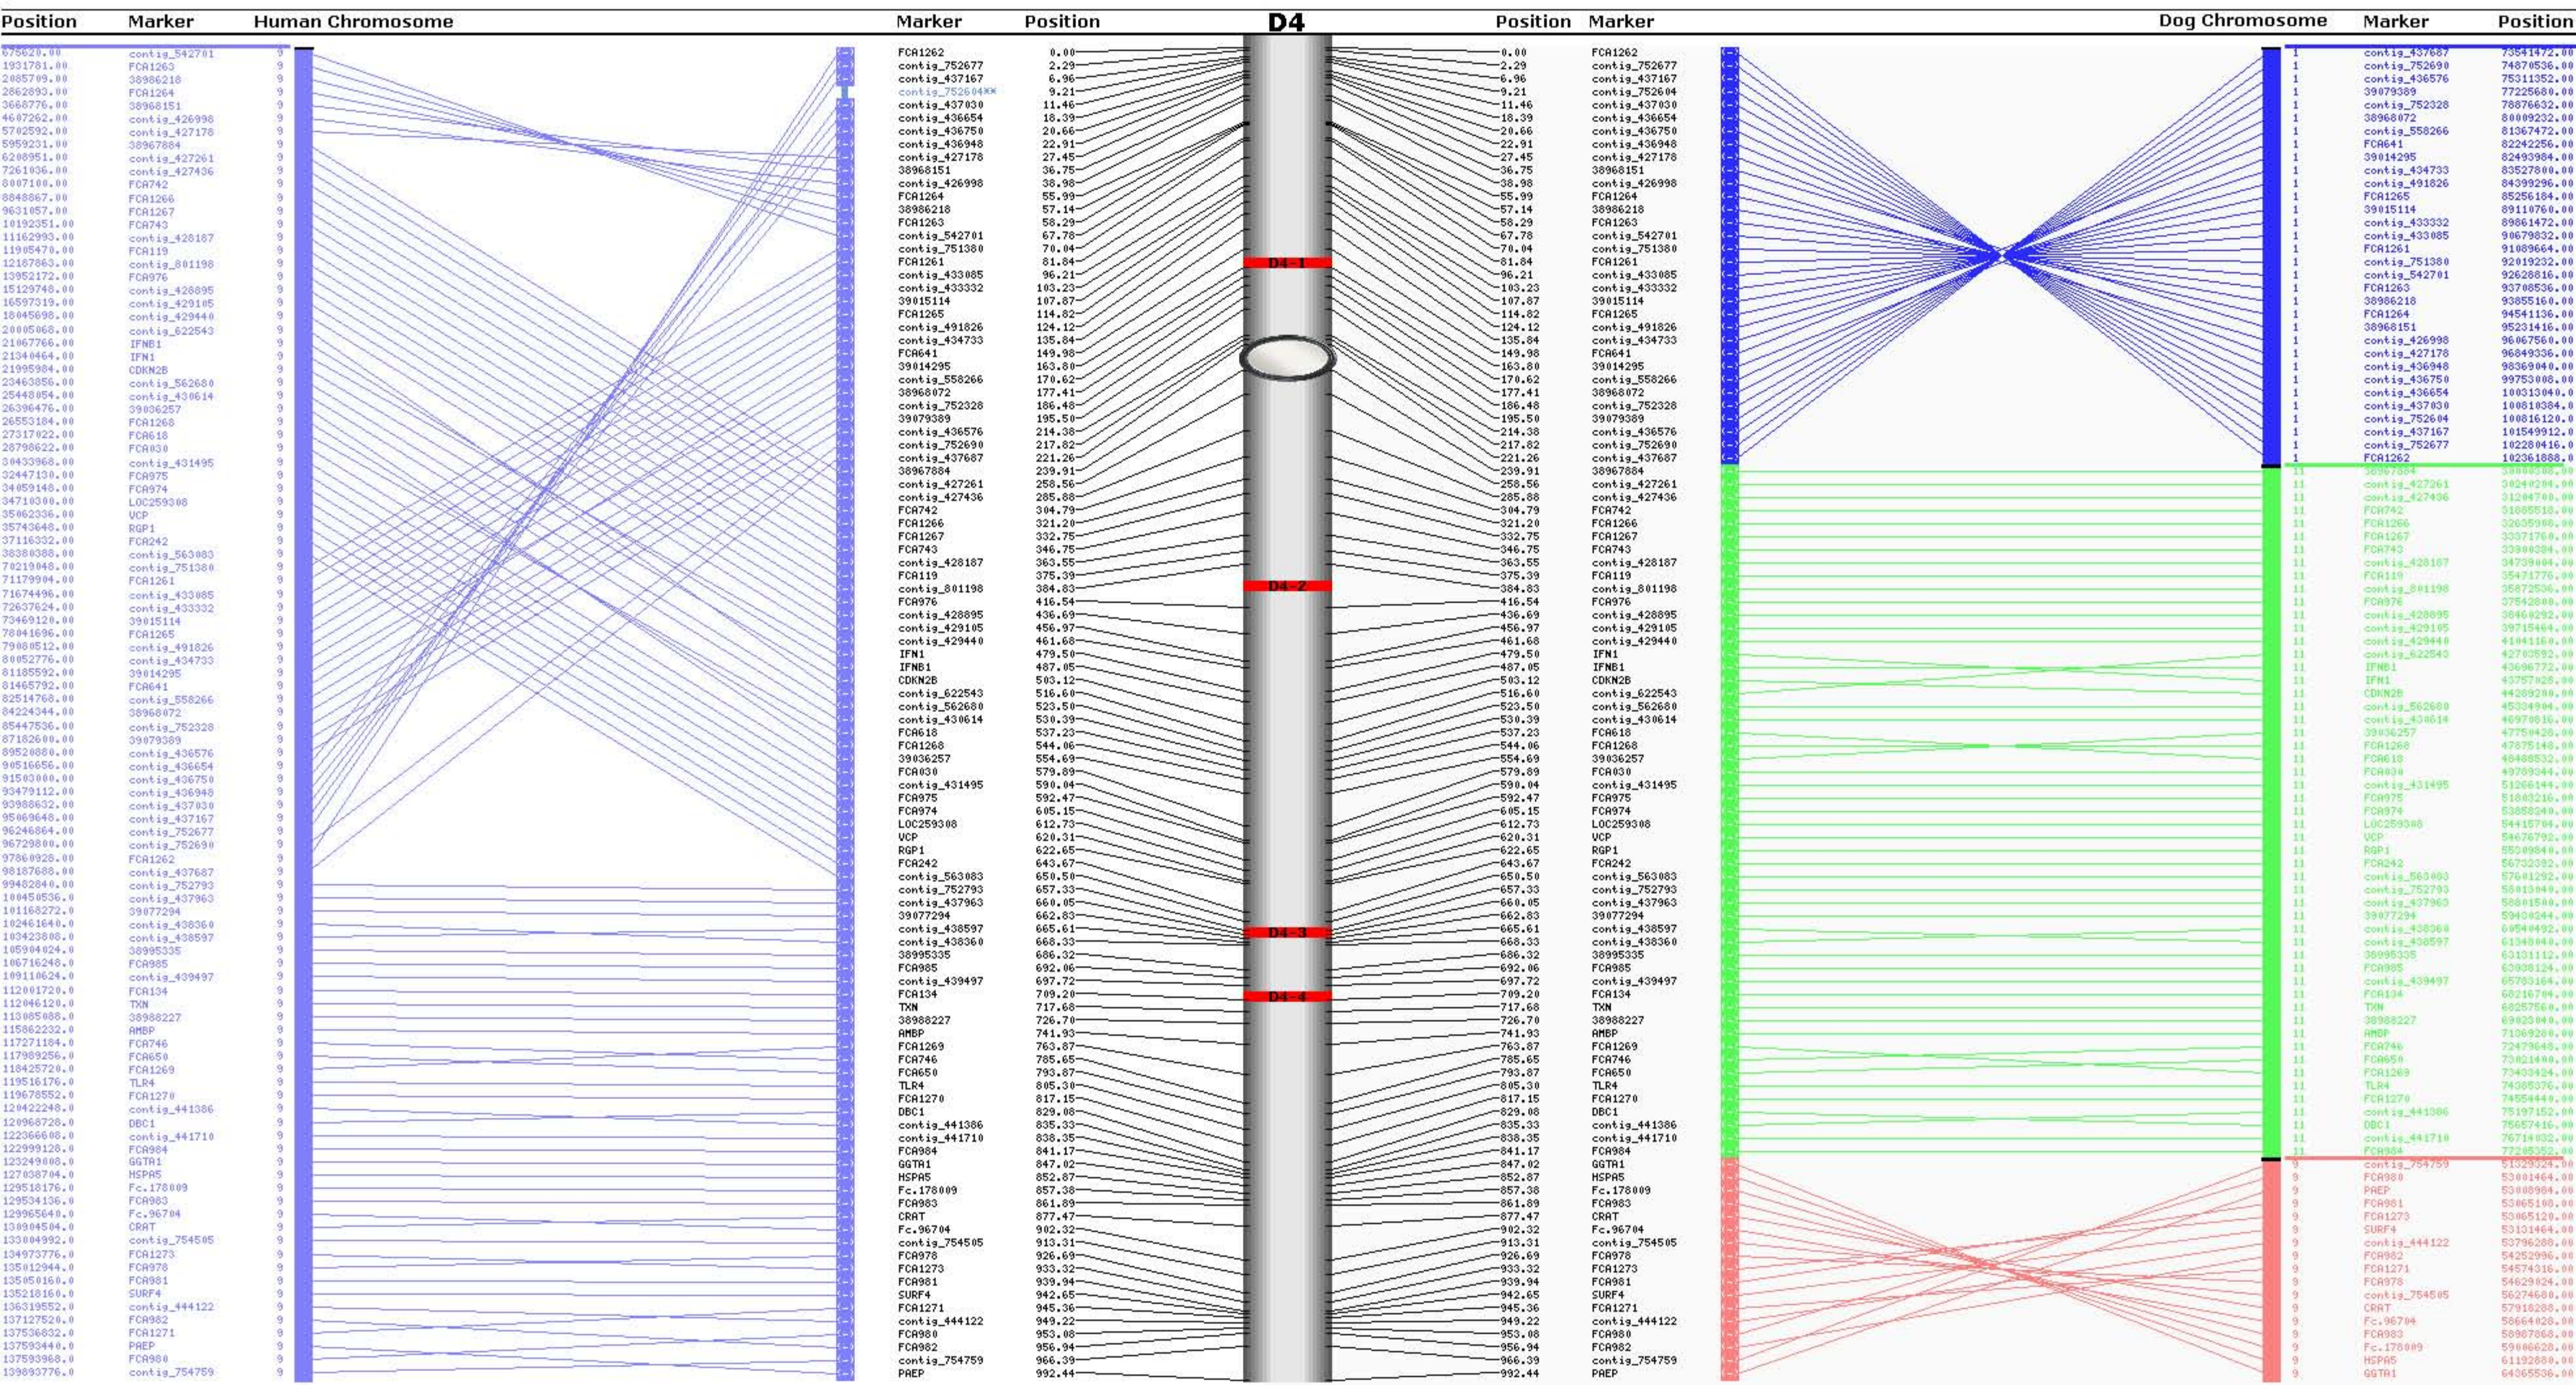

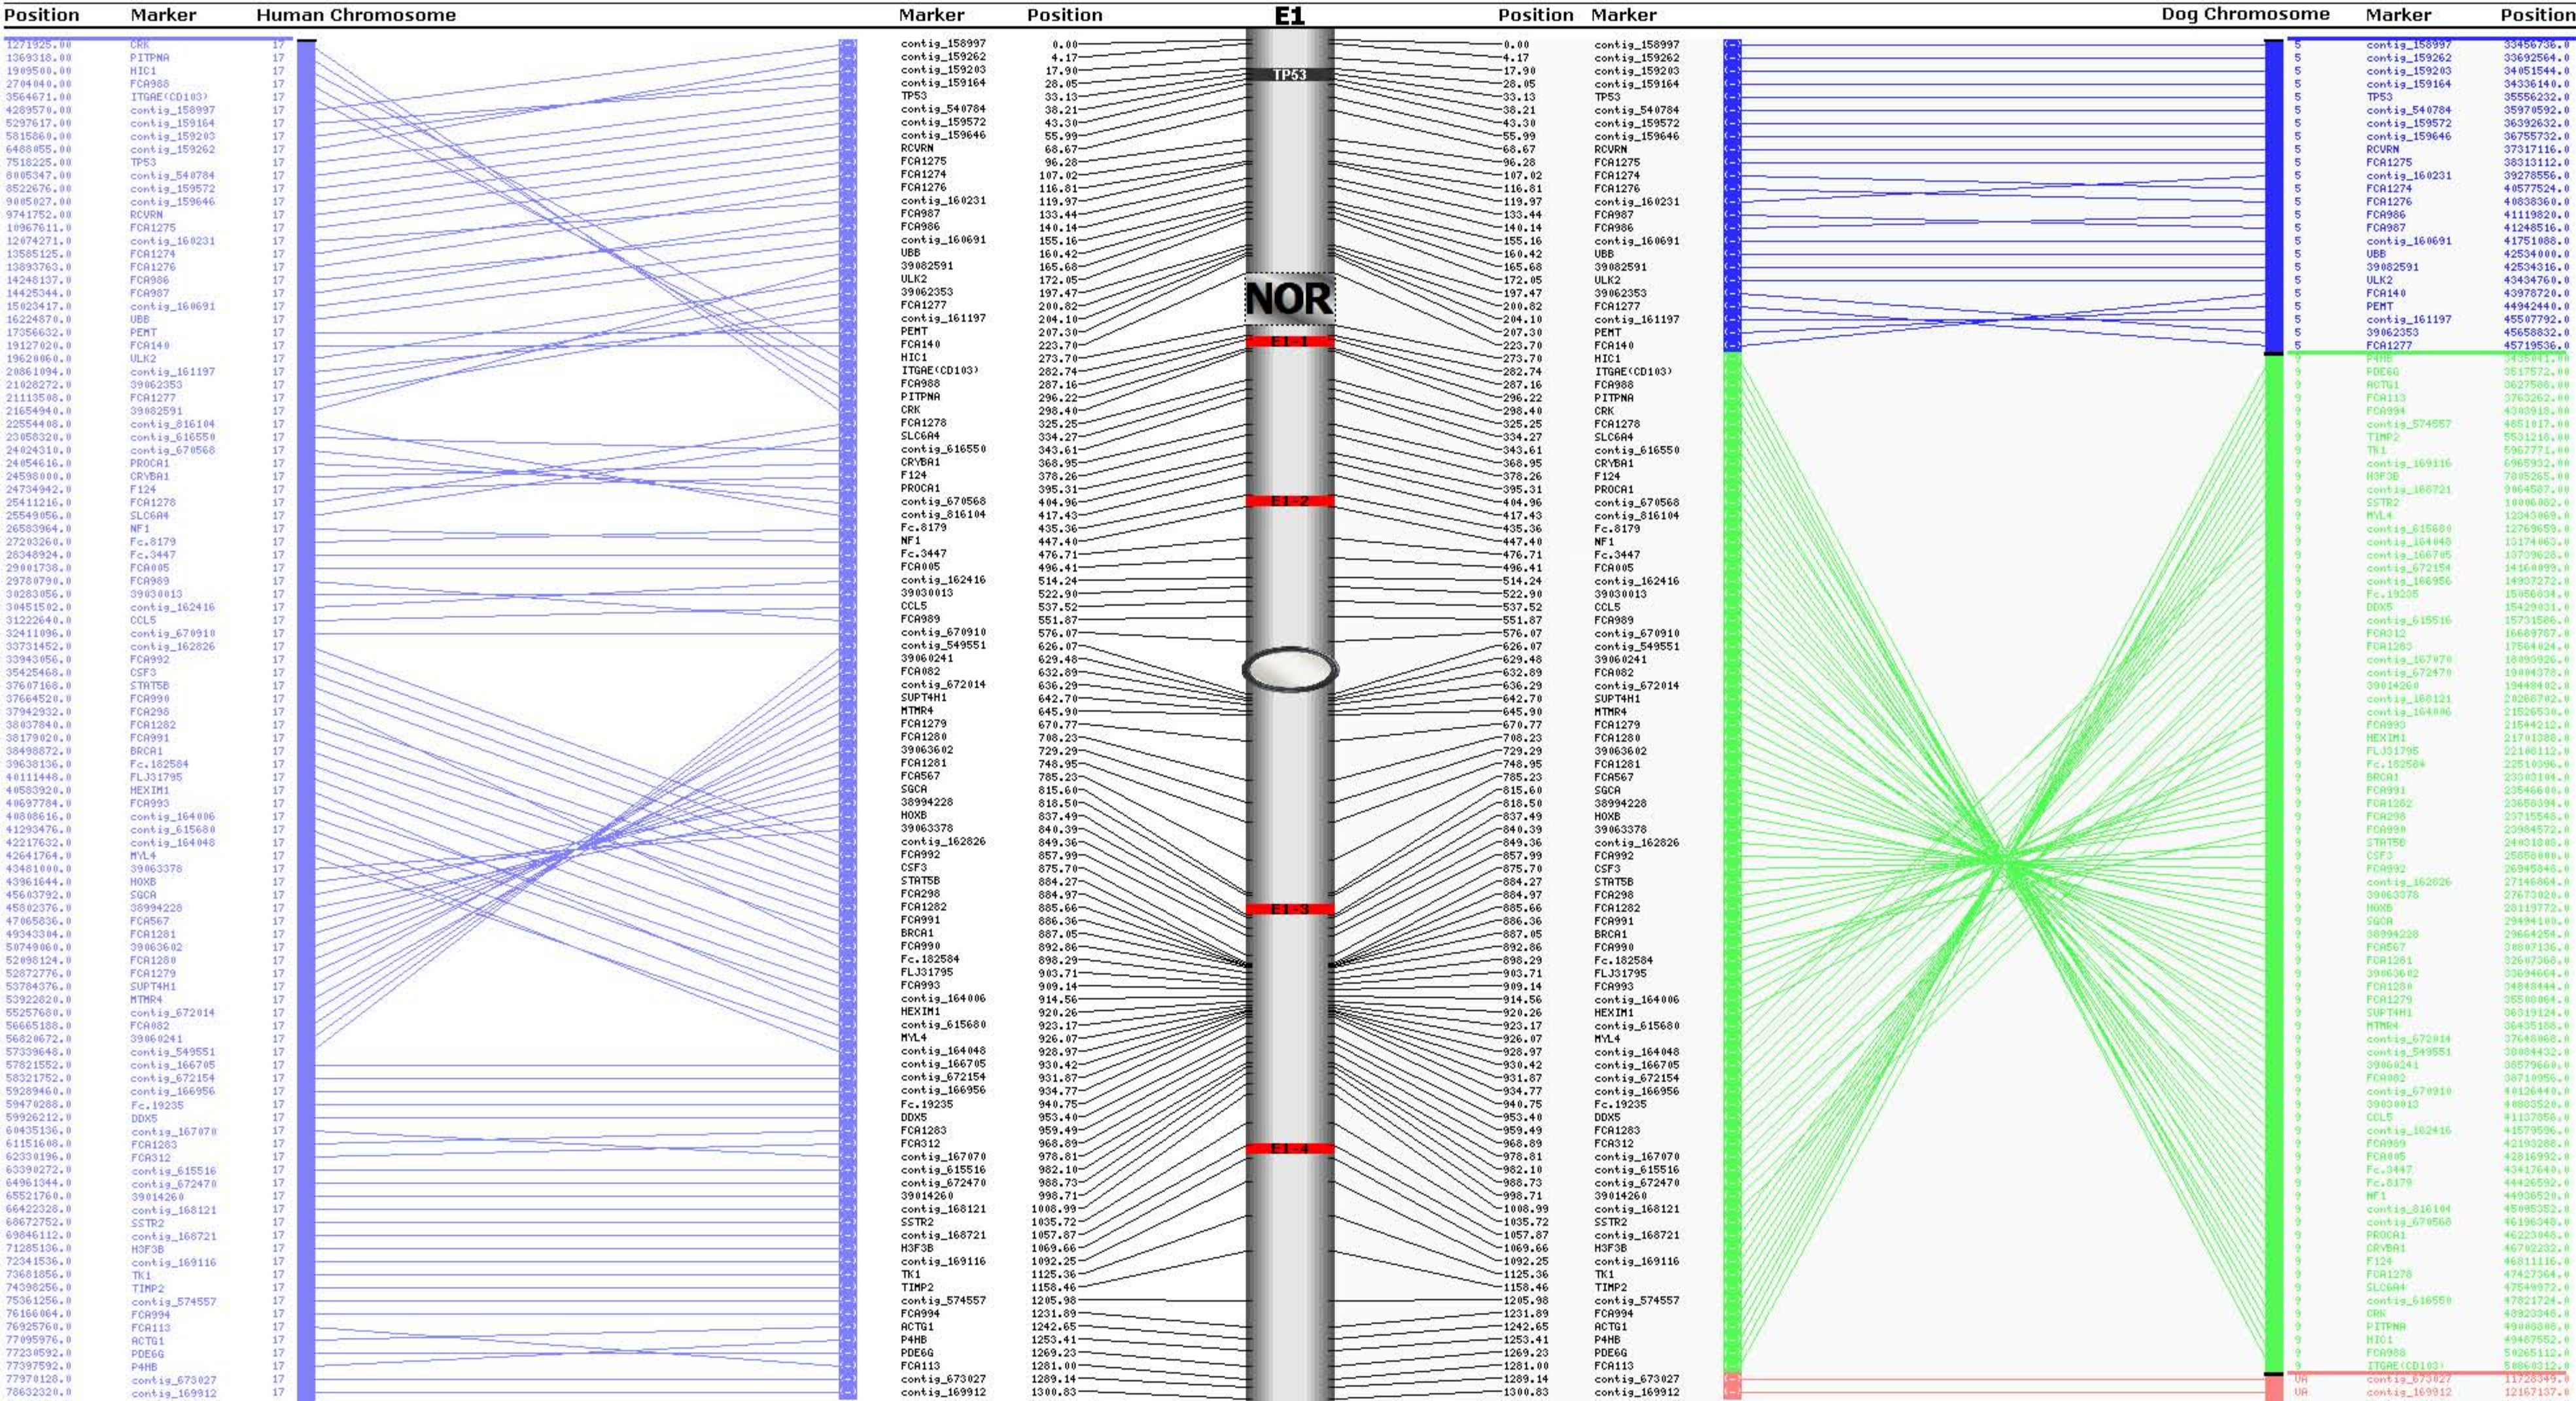

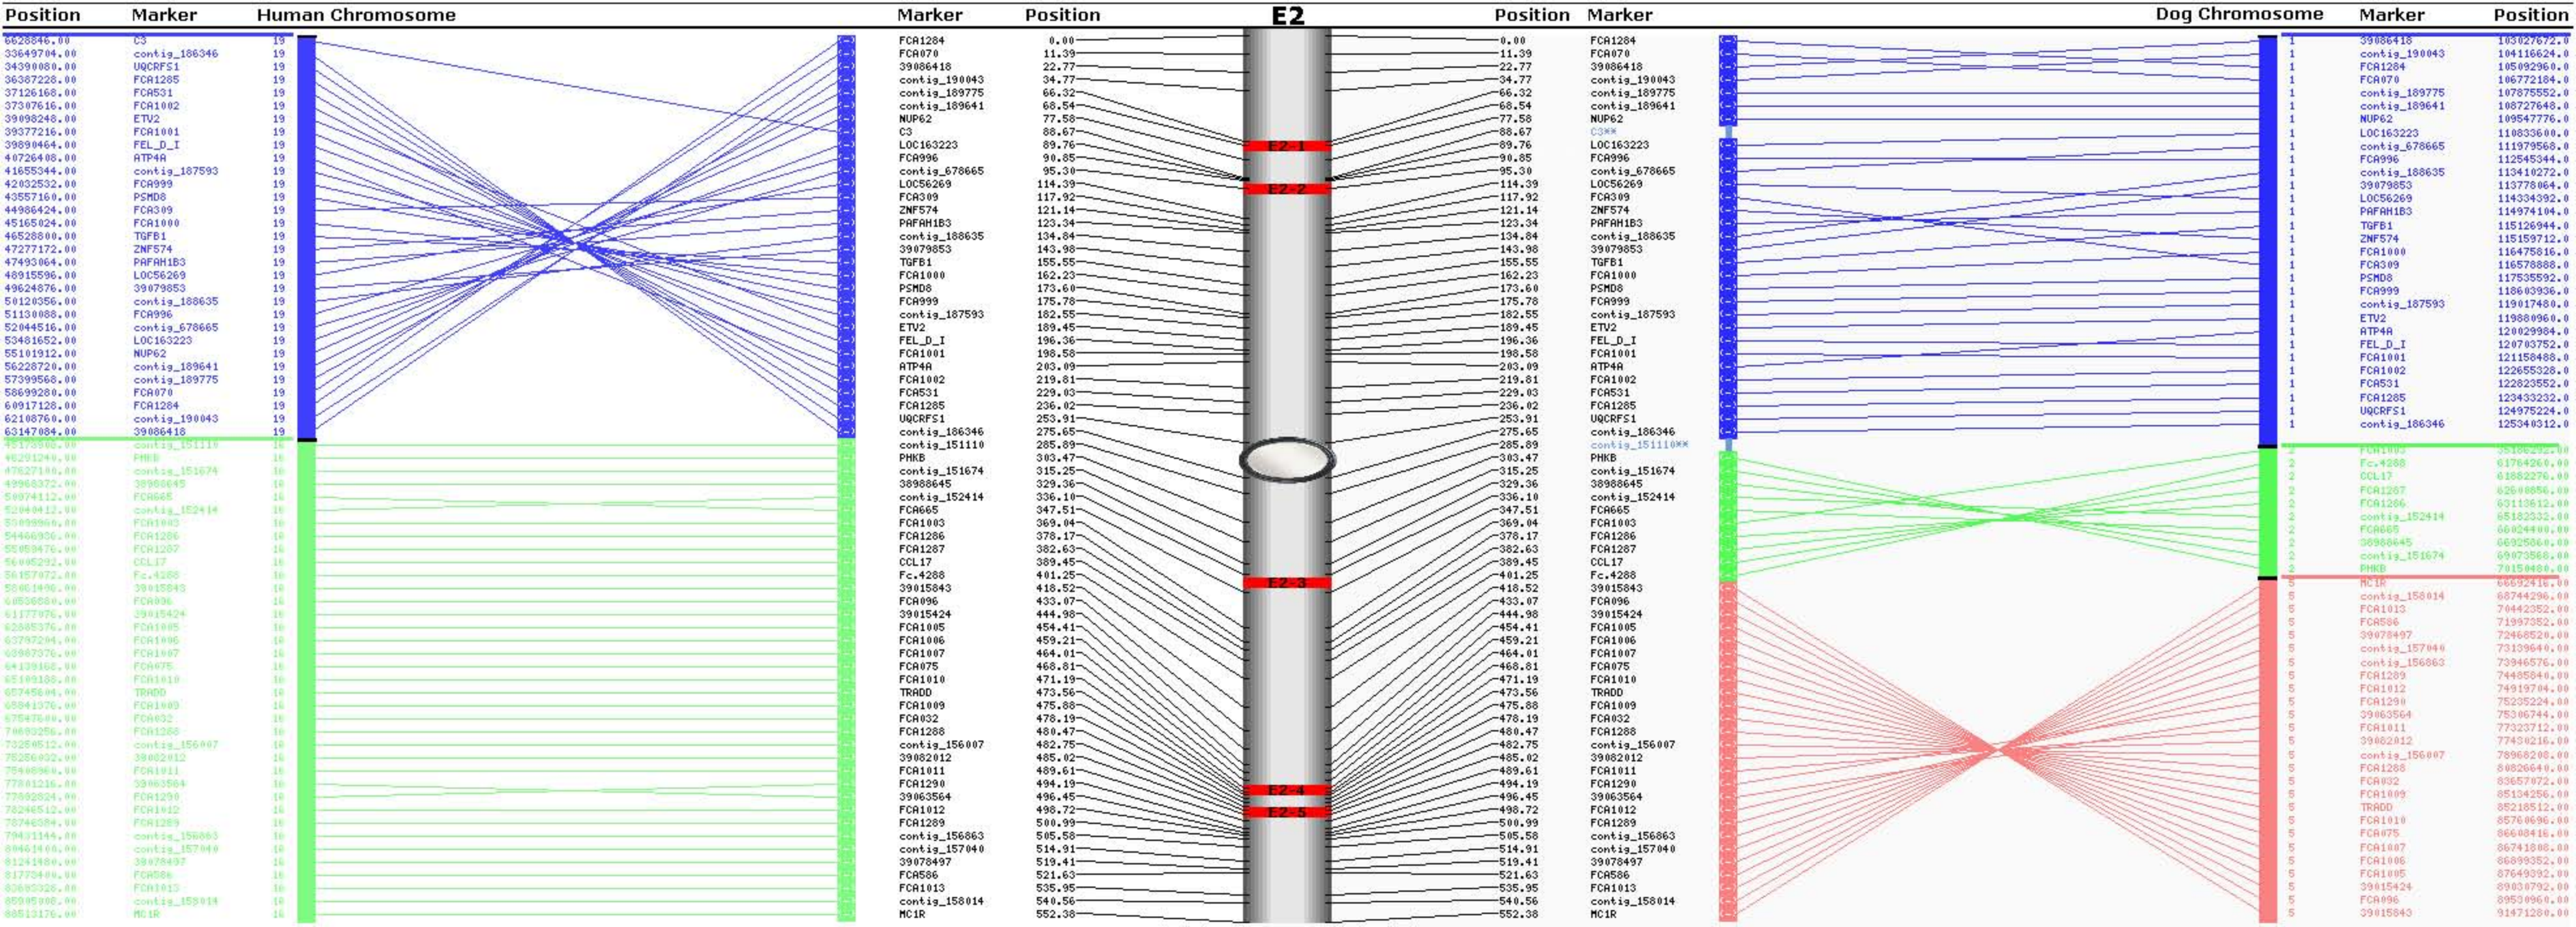

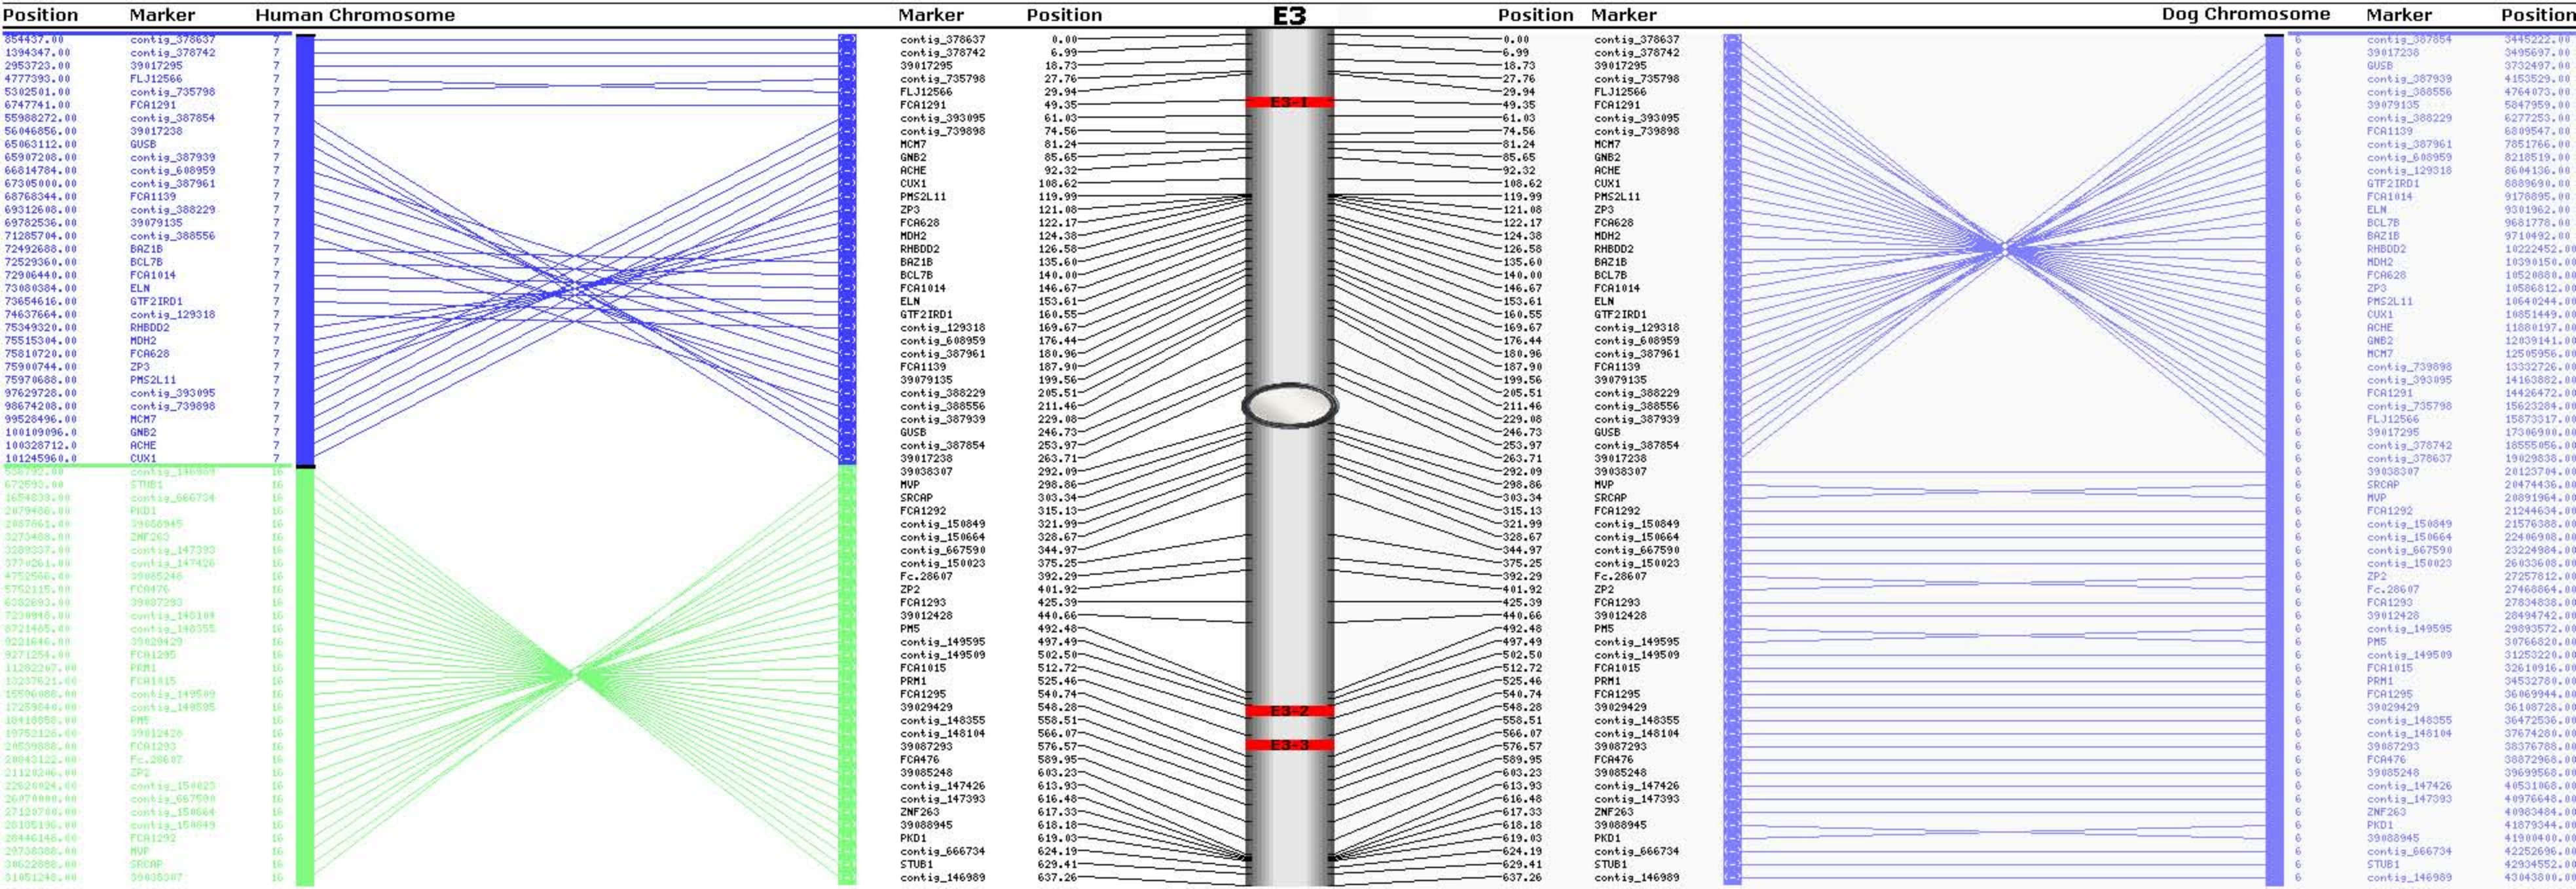



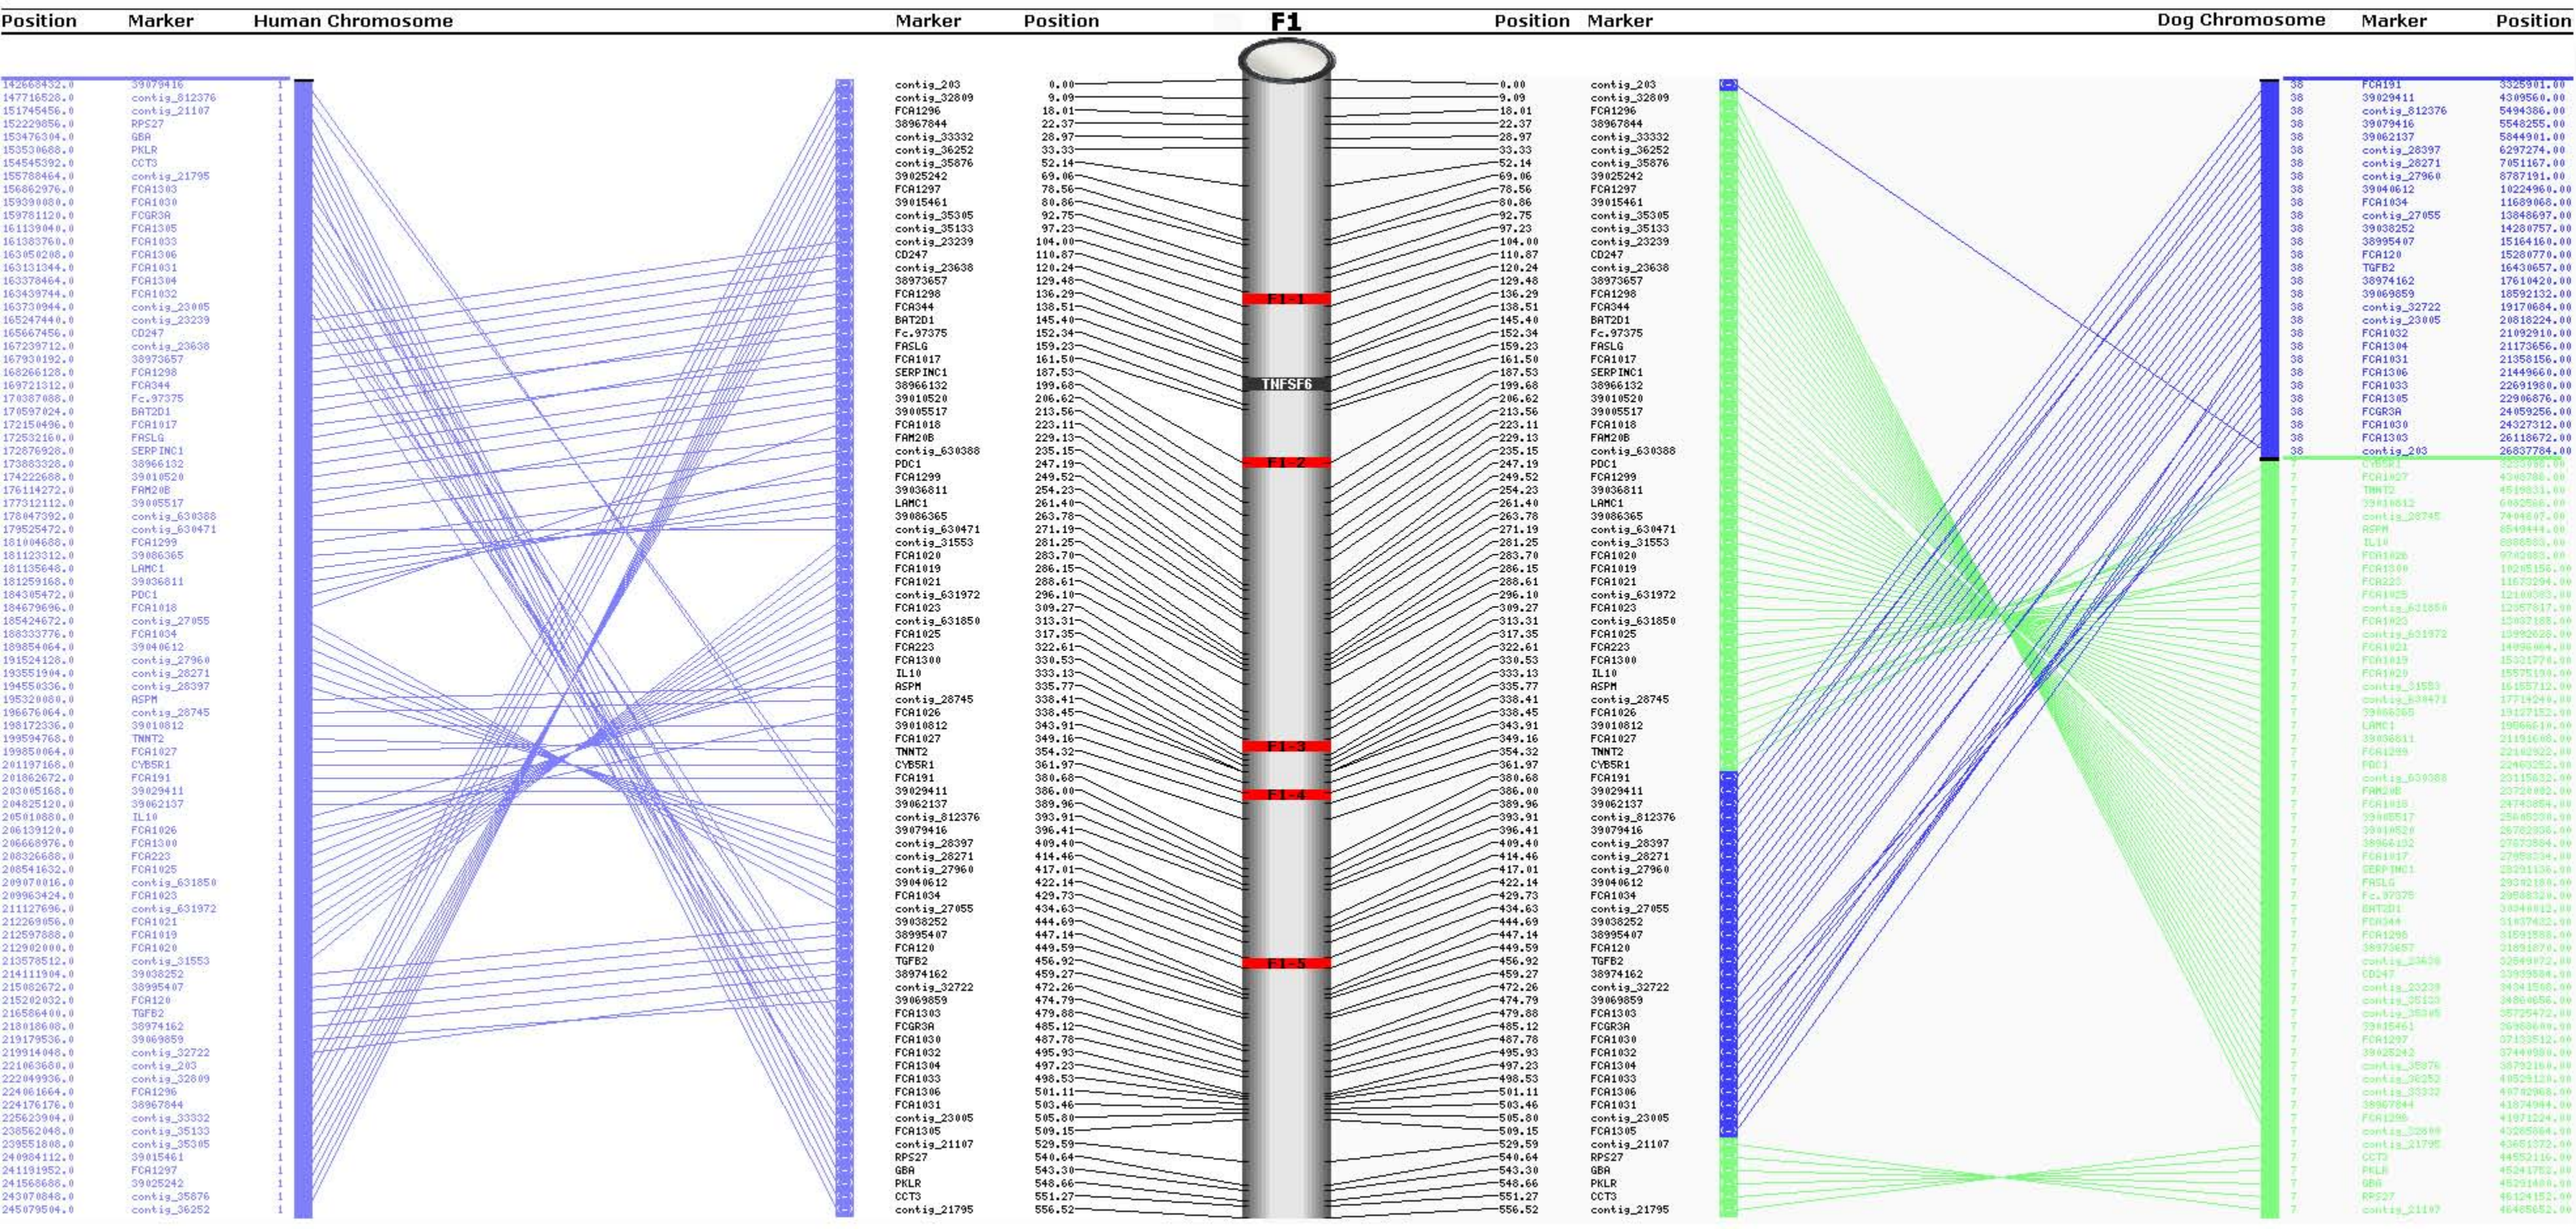

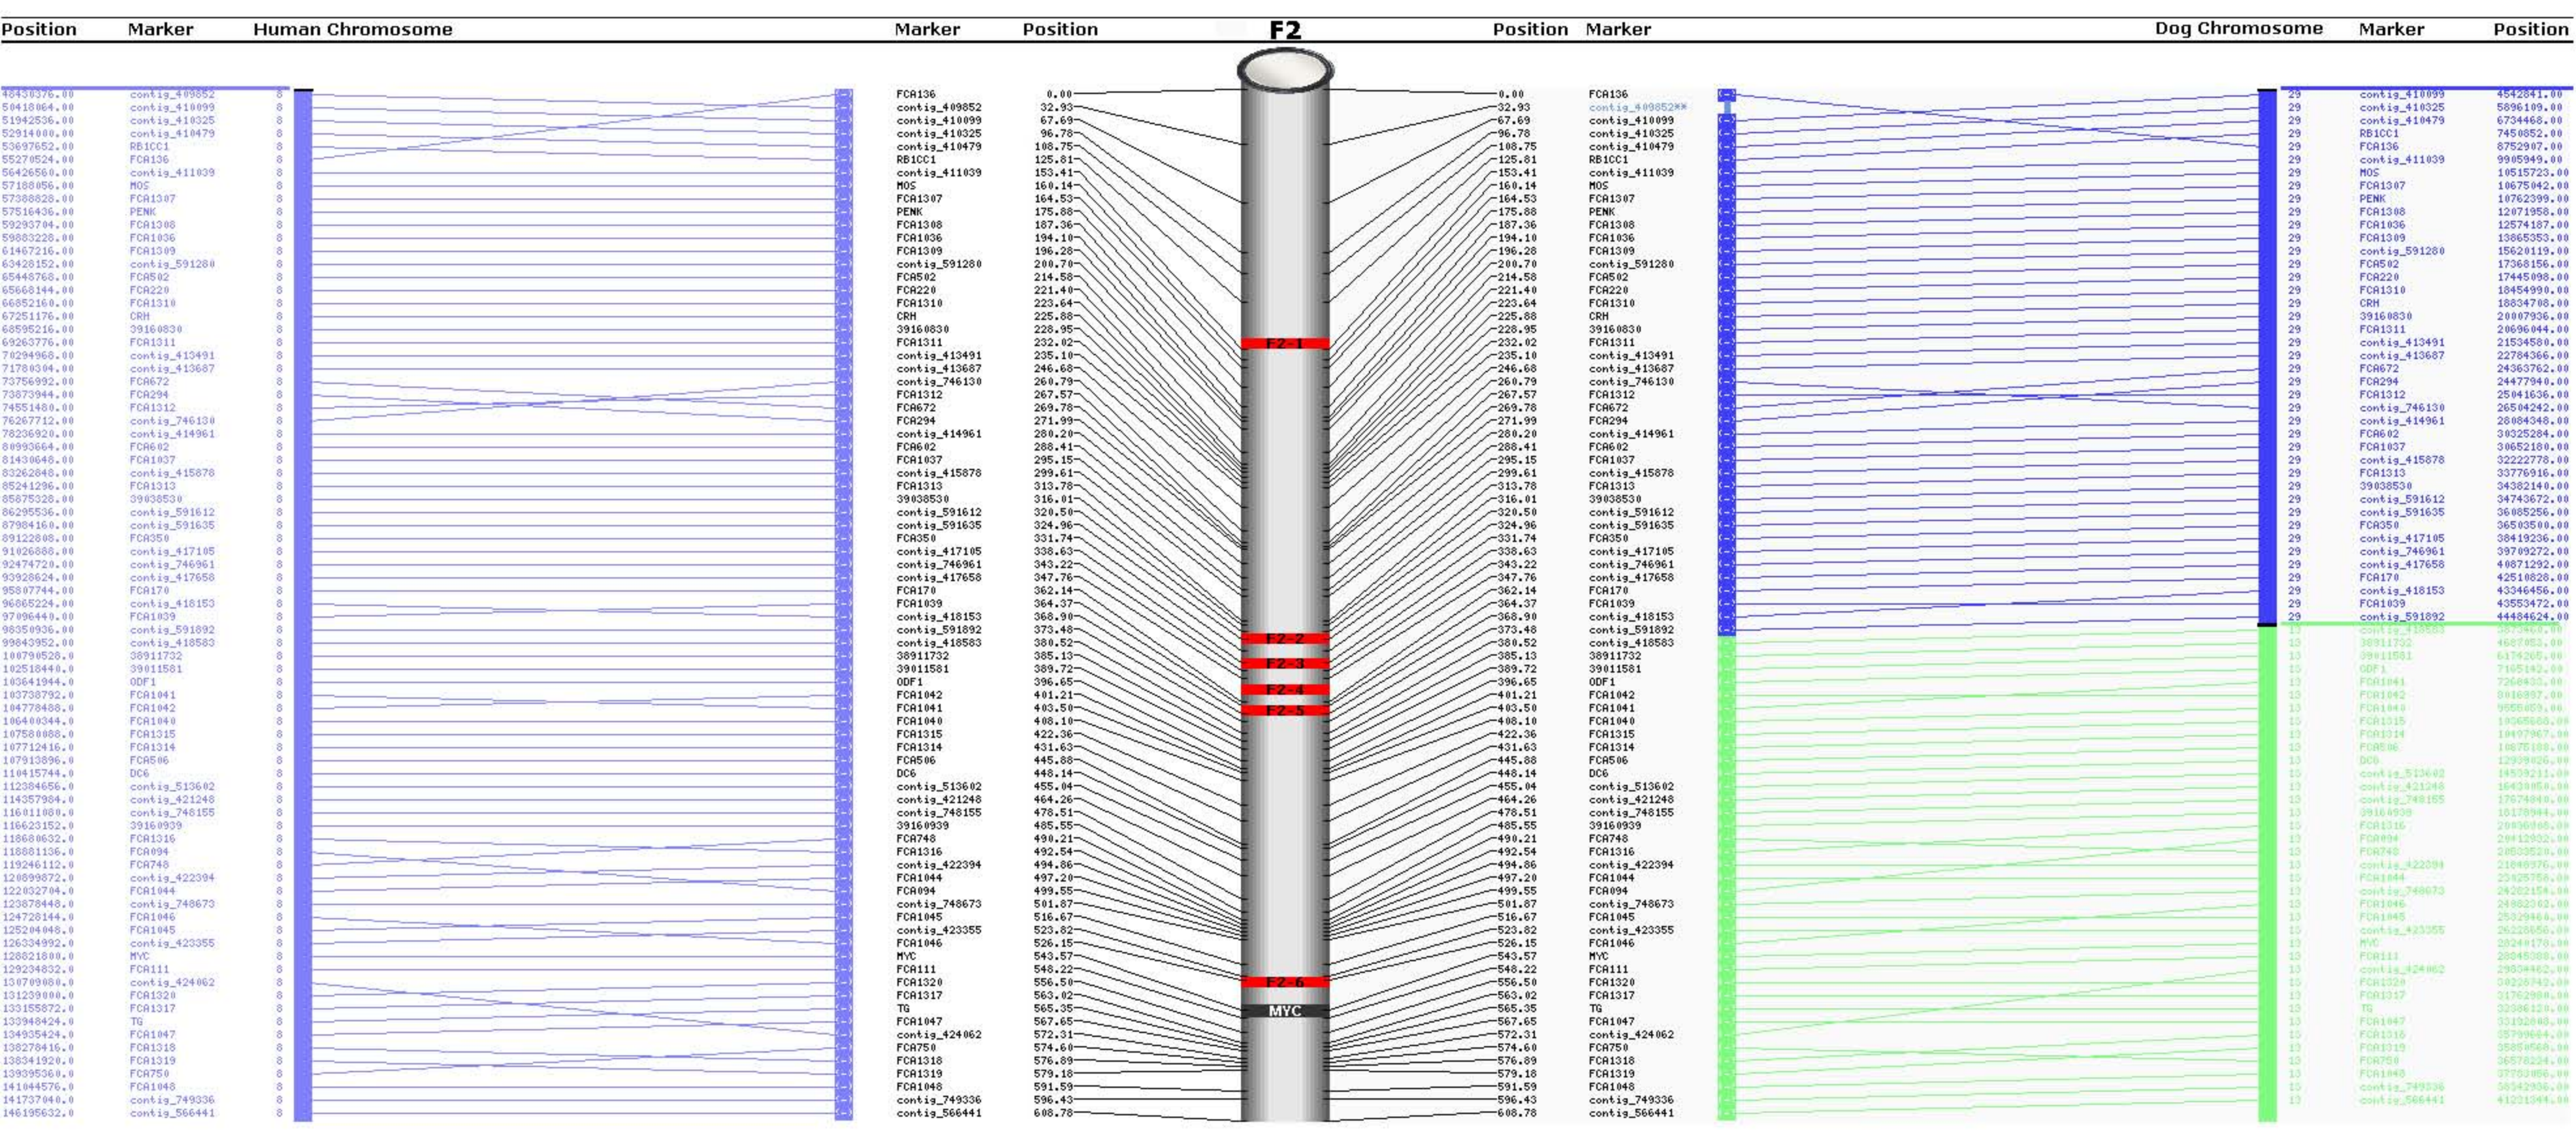

| Human Chromosome |                 |                 | Dog Chromosome |                 |              |
|------------------|-----------------|-----------------|----------------|-----------------|--------------|
| Marker           | Position        | Marker          | Position       | Marker          | Position     |
| 517886.00        | contig_617564   | scaffold_122909 | 17.13          | contig_617564   | 384674.00    |
| 2343791.00       | scaffold_122909 | 39062284        | 21.76          | scaffold_122909 | 1292587.00   |
| 4516120.00       | 39062284        | contig_617564   | 26.38          | 39062284        | 2443181.00   |
| 5818004.00       | NLGN4X          | NLGN4X          | 31.01          | NLGN4X          | 3362049.00   |
| 6253504.00       | contig_445130   | contig_445130   | 35.63          | contig_445130   | 3724476.00   |
| 6735063.00       | contig_754913   | contig_754913   | 47.44          | contig_754913   | 4044010.00   |
| 7701751.00       | contig_445240   | contig_445240   | 64.11          | contig_445240   | 4742409.00   |
| 8182191.00       | contig_618136   | contig_618136   | 66.29          | contig_618136   | 5116305.00   |
| 9393038.00       | TBL1X           | TBL1X           | 85.14          | TBL1X           | 6288150.00   |
| 9714495.00       | SHROOM2         | SHROOM2         | 96.63          | SHROOM2         | 6454947.00   |
| 9716559.00       | contig_445497   | MID1            | 101.12         | contig_445497   | 6457371.00   |
| 9907127.00       | 826277900       | 826277900       | 151.12         | 826277900       | 6629337.00   |
| 9967687.00       | 39085264        | 39085264        | 155.27         | 39085264        | 6692058.00   |
| 9995489.00       | WMC3            | AMELX           | 157.35         | WMC3            | 6692058.00   |
| 10374374.00      | MID1            | FCR1322         | 158.91         | MID1            | 7043934.00   |
| 10774374.00      | FCR1322         | AMELX           | 160.46         | FCR1322         | 7485329.00   |
| 11224845.00      | AMELX           | 39065680        | 163.67         | AMELX           | 7781656.00   |
| 13942300.00      | 39065680        | GLRR2           | 166.86         | 39065680        | 1091720.00   |
| 14457717.00      | GLRR2           | WMC3            | 166.86         | GLRR2           | 1091720.00   |
| 16516045.00      | CTP52           | CTP52           | 176.49         | CTP52           | 1279099.00   |
| 17605312.00      | SCHL1           | SCHL1           | 179.45         | SCHL1           | 1379553.00   |
| 18167356.00      | SCHL2           | SCHL2           | 185.40         | SCHL2           | 14291858.00  |
| 18671890.00      | PKRA2           | PKRA2           | 204.46         | PKRA2           | 14907613.00  |
| 19272020.00      | PDHR1           | PDHR1           | 207.38         | PDHR1           | 15291790.00  |
| 21302480.00      | CNKSR2          | CNKSR2          | 219.42         | CNKSR2          | 17138560.00  |
| 21960480.00      | PHEX            | ZFX             | 230.93         | PHEX            | 17783340.00  |
| 23882984.00      | EIF2S3          | PHEX            | 236.81         | EIF2S3          | 19615880.00  |
| 24077684.00      | ZFX             | EIF2S3          | 242.68         | ZFX             | 19713708.00  |
| 24568942.00      | FCR1323         | FCR1323         | 251.85         | FCR1323         | 20124664.00  |
| 27782616.00      | MAGEB3          | MAGEB3          | 260.89         | MAGEB3          | 22977812.00  |
| 28515480.00      | IL1RAPL1        | IL1RAPL1        | 271.09         | IL1RAPL1        | 23893940.00  |
| 30164518.00      | MAGEB2          | MAGEB2          | 281.31         | MAGEB2          | 25289900.00  |
| 31047266.00      | DMD             | DMD             | 291.51         | DMD             | 27784496.00  |
| 34555104.00      | THEM47          | FCR1324         | 310.25         | THEM47          | 29629156.00  |
| 37093544.00      | PRRG1           | THEM47          | 324.81         | PRRG1           | 32034940.00  |
| 37201776.00      | FCR1324         | PRRG1           | 327.54         | FCR1324         | 32097052.00  |
| 37893536.00      | SRPX            | SRPX            | 336.31         | SRPX            | 32855556.00  |
| 38093928.00      | OTC             | BCOR            | 345.27         | OTC             | 33093196.00  |
| 39795560.00      | BCOR            | OTC             | 348.11         | BCOR            | 34571476.00  |
| 40944440.00      | 39047717        | DDX3X           | 356.69         | 39047717        | 35587772.00  |
| 40976580.00      | USP9X           | 39047717        | 365.12         | USP9X           | 35608880.00  |
| 41094112.00      | DDX3X           | USP9X           | 370.60         | DDX3X           | 35723776.00  |
| 41988228.00      | FCR1325         | FCR1325         | 385.06         | FCR1325         | 36516082.00  |
| 43178632.00      | FCR1326         | FCR1326         | 399.62         | FCR1326         | 37459784.00  |
| 43475582.00      | MROA            | MROA            | 405.14         | MROA            | 37679624.00  |
| 44803536.00      | UTX             | UTX             | 419.69         | UTX             | 38853616.00  |
| 46351076.00      | SLOC9A7         | SLOC9A7         | 422.57         | SLOC9A7         | 40193960.00  |
| 46954389.00      | UBR1            | UBR1            | 425.45         | UBR1            | 40749144.00  |
| 46973072.00      | PCTK1           | PCTK1           | 428.33         | PCTK1           | 40766768.00  |
| 47315284.00      | ARAF            | ARAF            | 436.81         | ARAF            | 41138192.00  |
| 48219492.00      | FTSJ1           | FTSJ1           | 444.85         | FTSJ1           | 41677236.00  |
| 48635676.00      | TIMM17B         | TIMM17B         | 452.49         | TIMM17B         | 42082860.00  |
| 50044280.00      | CENB3           | CENB3           | 454.94         | CENB3           | 42916656.00  |
| 50678524.00      | BMP15           | BMP15           | 461.22         | BMP15           | 43717112.00  |
| 51249604.00      | NUDT11          | NUDT11          | 467.50         | NUDT11          | 44015020.00  |
| 51877664.00      | contig_485887   | contig_485887   | 484.91         | contig_485887   | 44559264.00  |
| 53263532.00      | JARID1C         | JARID1C         | 500.06         | JARID1C         | 44937900.00  |
| 55064276.00      | ALAS2           | ALAS2           | 507.40         | ALAS2           | 46730084.00  |
| 55495264.00      | MAGEH1          | MAGEH1          | 512.21         | MAGEH1          | 47049028.00  |
| 56276056.00      | KLF8            | KLF8            | 519.40         | KLF8            | 47753456.00  |
| 56606796.00      | UBQLN2          | UBQLN2          | 524.06         | UBQLN2          | 47895872.00  |
| 57178808.00      | SPIN2A          | SPIN2A          | 533.43         | SPIN2A          | 48129396.00  |
| 57634992.00      | ZXDB            | ZXDB            | 535.65         | ZXDB            | 48209228.00  |
| 61980700.00      | contig_757223   | contig_757223   | 551.64         | contig_757223   | 49489104.00  |
| 62987052.00      | contig_453034   | contig_453034   | 572.68         | contig_453034   | 52265832.00  |
| 63360800.00      | ASB12           | ASB12           | 586.21         | ASB12           | 52388160.00  |
| 64052988.00      | KIARA1166       | KIARA1166       | 602.38         | KIARA1166       | 52709288.00  |
| 64804236.00      | MSN             | MSN             | 616.26         | MSN             | 53633132.00  |
| 65158304.00      | VSIG4           | VSIG4           | 622.95         | VSIG4           | 53766688.00  |
| 65732208.00      | EDAR2           | EDAR2           | 632.00         | EDAR2           | 54668632.00  |
| 67179440.00      | OPHN1           | OPHN1           | 654.68         | OPHN1           | 55570576.00  |
| 67506280.00      | FCR1049         | FCR1049         | 657.05         | FCR1049         | 56054592.00  |
| 67784240.00      | STARDB8         | STARDB8         | 663.12         | STARDB8         | 56535952.00  |
| 68297424.00      | PJRI            | PJRI            | 669.07         | PJRI            | 56730432.00  |
| 69270040.00      | IGBP1           | IGBP1           | 681.08         | IGBP1           | 57513768.00  |
| 70240488.00      | IL2RG           | IL2RG           | 698.68         | IL2RG           | 53040712.00  |
| 70664576.00      | TRF1            | TRF1            | 703.49         | TRF1            | 53619224.00  |
| 71165648.00      | FCR1327         | FCR1327         | 713.72         | FCR1327         | 59005416.00  |
| 71408624.00      | RPS4X           | RPS4X           | 727.18         | RPS4X           | 59219452.00  |
| 72962632.00      | XIST            | XIST            | 738.07         | XIST            | 60379324.00  |
| 74189832.00      | ABCB7           | ABCB7           | 740.78         | ABCB7           | 61359944.00  |
| 74919552.00      | MAGEE2          | MAGEE2          | 745.12         | MAGEE2          | 61929904.00  |
| 77041616.00      | COX7B           | COX7B           | 749.32         | COX7B           | 63254924.00  |
| 77052768.00      | ATP7A           | ATP7A           | 752.07         | ATP7A           | 63338256.00  |
| 77798224.00      | ZCCHC5          | ZCCHC5          | 760.39         | ZCCHC5          | 63726456.00  |
| 78502536.00      | ITM2A           | ITM2A           | 763.03         | ITM2A           | 64620072.00  |
| 79816352.00      | BRWD3           | BRWD3           | 771.29         | BRWD3           | 65068676.00  |
| 82649952.00      | POU3F4          | POU3F4          | 776.99         | POU3F4          | 67482984.00  |
| 83205944.00      | RPS6KA6         | RPS6KA6         | 779.89         | RPS6KA6         | 67974960.00  |
| 84233952.00      | SATL1           | SATL1           | 785.98         | SATL1           | 69099064.00  |
| 85006168.00      | CHM             | CHM             | 795.61         | CHM             | 69688752.00  |
| 85290280.00      | DACH2           | DACH2           | 798.82         | DACH2           | 69880384.00  |
| 89063600.00      | TGIF2LX         | TGIF2LX         | 802.01         | TGIF2LX         | 71372400.00  |
| 90577280.00      | PABPC5          | PABPC5          | 805.20         | PABPC5          | 71542456.00  |
| 95826368.00      | DIAPH2          | DIAPH2          | 808.40         | DIAPH2          | 73958080.00  |
| 97514440.00      | contig_455044   | contig_455044   | 811.61         | contig_455044   | 75038504.00  |
| 99433296.00      | PCDH19          | PCDH19          | 825.67         | PCDH19          | 77248968.00  |
| 100513120.00     | BTK             | BTK             | 832.43         | BTK             | 78355200.00  |
| 102217408.00     | NXF3            | NXF3            | 835.62         | NXF3            | 79108304.00  |
| 104219128.00     | contig_455745   | AMNCCR1         | 845.34         | contig_455745   | 81603000.00  |
| 106030048.00     | CLDN2           | TRPCS           | 849.96         | CLDN2           | 83543576.00  |
| 107221696.00     | RTN4            | contig_758358   | 854.57         | RTN4            | 84701768.00  |
| 109328272.00     | AMNCCR1         | AMNCCR1         | 858.87         | AMNCCR1         | 85470696.00  |
| 110904200.00     | TRPCS           | HTR2C           | 863.16         | TRPCS           | 87980204.00  |
| 112633328.00     | contig_758358   | AGTR2           | 869.14         | contig_758358   | 88217568.00  |
| 111904384.00     | AMOT            | BIRC4           | 872.21         | AMOT            | 88899056.00  |
| 114047280.00     | HTR2C           | contig_458332   | 875.28         | HTR2C           | 90407752.00  |
| 115216064.00     | AGTR2           | contig_758803   | 878.19         | AGTR2           | 91768912.00  |
| 115481816.00     | SLC6A14         | CUL4BX          | 881.11         | SLC6A14         | 92005080.00  |
| 116915808.00     | KLHL13          | PGRMC1          | 884.03         | KLHL13          | 93204784.00  |
| 117745584.00     | IL13RA1         | IL13RA1         | 889.73         | IL13RA1         | 93990880.00  |
| 118254304.00     | PGRMC1          | KLHL13          | 892.51         | PGRMC1          | 94396304.00  |
| 119542504.00     | CUL4BX          | SLC6A14         | 901.83         | CUL4BX          | 95559400.00  |
| 120303208.00     | contig_758803   | RTN4            | 911.15         | contig_758803   | 96232016.00  |
| 121405496.00     | contig_458332   | CLDN2           | 912.72         | contig_458332   | 97260744.00  |
| 122821728.00     | BIRC4           | contig_455745   | 914.34         | BIRC4           | 98369168.00  |
| 123307872.00     | SH2D1A          | SH2D1A          | 931.51         | SH2D1A          | 98807736.00  |
| 128408160.00     | SMARCA1         | SMARCA1         | 941.02         | SMARCA1         | 103732904.00 |
| 129091016.00     | RIFM1           | RIFM1           | 944.32         | RIFM1           | 104337920.00 |
| 130505728.00     | OR13H1          | OR13H1          | 947.52         | OR13H1          | 105700664.00 |
| 134247392.00     | ZNF75           | ZNF75           | 950.75         | ZNF75           | 108852480.00 |
| 138440560.00     | F9              | F9              | 956.99         | F9              | 112598872.00 |
| 140753760.00     | MAGEC3          | MAGEC3          | 960.09         | MAGEC3          | 113758712.00 |
| 144707040.00     | SLITRK2         | SLITRK2         | 973.35         | SLITRK2         | 117646736.00 |
| 146801200.00     | FMR1            | FMR1            | 979.92         | FMR1            | 119332240.00 |
| 147393004.00     | AFF2            | AFF2            | 983.20         | AFF2            | 119919640.00 |
| 151837328.00     | ZNF185          | ZNF185          | 989.96         | ZNF185          | 123839984.00 |
| 152424624.00     | BGN             | BGN             | 995.22         | BGN             | 124375008.00 |
| 153143600.00     | OPN1LW          | MPP1            | 1000.46        | OPN1LW          | 125022392.00 |
| 153660176.00     | MPP1            | OPN1LW          | 1003.75        | MPP1            | 125872536.00 |
| 154650672.00     | SPRY3           | SPRY3           | 1010.34        | SPRY3           | 126630112.00 |
